# 1            **Fibrocyte accumulation in bronchi: a cellular hallmark of COPD**

2  
3    Isabelle Dupin<sup>1,2,\*</sup>, Matthieu Thumerel<sup>1,2,3,\*</sup>, Elise Maurat<sup>1,2</sup>, Florence Coste<sup>1,2</sup>, Hugues Begueret<sup>3</sup>,  
4    Thomas Trian<sup>1,2</sup>, Michel Montaudon<sup>1,2,3</sup>, Roger Marthan<sup>1,2,3</sup>, Pierre-Olivier Girodet<sup>1,2,3</sup>, Patrick  
5    Berger<sup>1,2,3</sup>

6  
7    <sup>1</sup>Univ-Bordeaux, Centre de Recherche Cardio-thoracique de Bordeaux, U1045, Département de  
8    Pharmacologie, CIC 1401, F-33000 Bordeaux, France

9    <sup>2</sup>INSERM, Centre de Recherche Cardio-thoracique de Bordeaux, U1045, CIC 1401, F-33000  
10    Bordeaux, France

11    <sup>3</sup>CHU de Bordeaux, Service d'exploration fonctionnelle respiratoire, Service de chirurgie  
12    thoracique, Service d'anatomopathologie, Service de radiologie, CIC 1401, F-33604 Pessac,  
13    France

14    \* equal contribution (co-1<sup>st</sup> author)

15  
16  
17    **Corresponding author:** Isabelle Dupin,

18    Univ-Bordeaux, Centre de Recherche Cardio-thoracique de Bordeaux, U1045, 146 rue Leo Saignat  
19    Zone, F-33000 Bordeaux, France

20    Telephone number : +33 5 57 57 16 94 Fax number : +33 5 57 57 16 95

21    e-mail: [isabelle.dupin@u-bordeaux.fr](mailto:isabelle.dupin@u-bordeaux.fr)

22  
23    **Disclosure of potential conflict of interest:**

24    I. Dupin has received research support from Fondation Bordeaux Université. P-O. Girodet has  
25    received research support from Novartis, Chiesi, Boehringer Ingelheim, GlaxoSmithKline and

26    AstraZeneca outside the submitted work. P. Berger has received research support from Nycomed,

27 Takeda, Fondation du Souffle–Fonds de dotation Recherche en Santé Respiratoire, Novartis, Pierre  
28 Fabre, Chiesi, Boehringer Ingelheim, AstraZeneca, and GlaxoSmithKline. I. Dupin, P. Berger and  
29 P-O. Girodet have a patent pending (EP No. 15152886.6; ie, New compositions and methods of  
30 treating and/or preventing chronic obstructive pulmonary disease).The rest of the authors declare  
31 that they have no relevant conflicts of interest.

32  
33 **Funding:** This study was sponsored and supported by Bordeaux University Hospital (*i.e.* “CHU  
34 de Bordeaux”). This study was supported by a grant from the “Fondation Bordeaux Université”,  
35 with funding from "Assistance Ventilatoire à Domicile" (AVAD) and "Fédération Girondine de  
36 Lutte contre les Maladies Respiratoires" (FGLMR).

## 37 **Abstract**

## 38 **Background**

39 The remodeling mechanism and cellular players causing persistent airflow limitation in chronic  
40 obstructive pulmonary disease (COPD) remain largely elusive. We have recently demonstrated that  
41 circulating fibrocytes, a rare population of fibroblast-like cells produced by the bone marrow  
42 stroma, are increased in COPD patients during an exacerbation. It remains, however, unclear,  
43 whether fibrocytes are present in bronchial tissue of COPD patients.

## 44 **Objective**

45 We aimed to quantify fibrocytes density in bronchial specimens from both control subjects and  
46 COPD patients, and to define associations with clinical, functional and computed tomography  
47 relevant parameters.

## 48 **Methods**

49 17 COPD patients and 25 control subjects with normal lung function testing and no chronic  
50 symptoms, all of them requiring thoracic surgery, were recruited. LFT and CT-scan were  
51 performed before surgery. Using co-immunostaining and image analysis, we identify CD45<sup>+</sup> FSP1<sup>+</sup>  
52 cells as tissue fibrocytes and quantify their density in distal and proximal bronchial specimens from  
53 the whole series.

## 54 **Results**

55 Here, we demonstrate that fibrocytes are increased in both distal and proximal tissue specimens of  
56 COPD patients, compared to those of controls. The density of fibrocytes is negatively correlated  
57 with lung function parameters, such as FEV1 and FEV1/FVC, and positively with bronchial wall  
58 thickness assessed by CT scan. High density of distal bronchial fibrocytes predicts presence of  
59 COPD with a sensitivity of 83% and a specificity of 70%.

## 60 **Conclusions**

61 Our results thus suggest that recruitment of fibrocytes in the bronchi may participate to lung  
62 function decline during COPD progression.

63

64 **Number of words in the abstract: 239**

65 **Clinical Implications**

66 High density of tissue fibrocytes is associated with a deteriorated lung function and an increase in  
67 airway wall thickness. A low density tissue fibrocytes virtually eliminates the presence of COPD.

68

69 **Capsule summary**

70

71 Blood fibrocytes assessed during exacerbation is a predictor of mortality in COPD. This study  
72 shows an increase of bronchial fibrocytes, that is associated with lower lung function, increased  
73 bronchial thickness and air trapping in COPD.

74

75 **Key words:** COPD, lung function, away remodeling, CT scan, fibrocytes

## 76 **Abbreviations**

|     |                         |                                                        |
|-----|-------------------------|--------------------------------------------------------|
| 77  |                         |                                                        |
| 78  | <b>APC</b>              | Allophycocyanin                                        |
| 79  |                         |                                                        |
| 80  | <b>BEC</b>              | Bronchial Epithelial Cells                             |
| 81  |                         |                                                        |
| 82  | <b>CSA</b>              | Cross Section Area                                     |
| 83  |                         |                                                        |
| 84  | <b>CSN</b>              | Cross Section Number                                   |
| 85  |                         |                                                        |
| 86  | <b>GOLD</b>             | Global Initiative for Chronic Obstructive Lung Disease |
| 87  |                         |                                                        |
| 88  | <b>COPD</b>             | Chronic Obstructive Pulmonary Disease                  |
| 89  |                         |                                                        |
| 90  | <b>CT</b>               | Computed tomography                                    |
| 91  |                         |                                                        |
| 92  | <b>FEV<sub>1</sub></b>  | Forced Expiratory Volume in 1 second                   |
| 93  |                         |                                                        |
| 94  | <b>FITC</b>             | Fluorescein isothiocyanate                             |
| 95  |                         |                                                        |
| 96  | <b>FVC</b>              | Forced Vital Capacity                                  |
| 97  |                         |                                                        |
| 98  | <b>FSP1</b>             | Fibroblast-Specific Protein 1                          |
| 99  |                         |                                                        |
| 100 | <b>LA</b>               | Lumen Area                                             |
| 101 |                         |                                                        |
| 102 | <b>LAA</b>              | Low Attenuation Area                                   |
| 103 |                         |                                                        |
| 104 | <b>MLA</b>              | Mean Lung Attenuation                                  |
| 105 |                         |                                                        |
| 106 | <b>PaCO<sub>2</sub></b> | Arterial Partial Pressure of Carbon Dioxide            |
| 107 |                         |                                                        |
| 108 | <b>PaO<sub>2</sub></b>  | Arterial Partial Pressure of Oxygen                    |
| 109 |                         |                                                        |
| 110 | <b>PE</b>               | Phycoerythrin                                          |
| 111 |                         |                                                        |
| 112 | <b>PBMC</b>             | Peripheral Blood Mononuclear Cells                     |
| 113 |                         |                                                        |
| 114 | <b>TLCO</b>             | Transfer Lung capacity of Carbon monoxide              |
| 115 |                         |                                                        |
| 116 | <b>WA</b>               | Wall Area                                              |
| 117 |                         |                                                        |
| 118 | <b>WT</b>               | Wall Thickness                                         |
| 119 |                         |                                                        |

## 120 **Introduction**

121 Chronic obstructive pulmonary disease (COPD) is characterized by chronic persistent  
122 inflammation and remodeling leading to progressive airflow limitation (1, 2). The evolution of this  
123 chronic disease is worsened by acute exacerbations, frequently triggered by viral or bacterial  
124 infections (3). These exacerbations are considered as an independent prognostic factor for mortality  
125 (4). Current pharmacological treatments for COPD patients decrease exacerbation frequency by  
126 only up to 29% as compared to placebo either alone or in combination, but they do not have any  
127 significant effect on mortality (5-7). COPD patients exhibit remodeling processes leading to  
128 permanent changes in tissue structure, such as epithelial mucous metaplasia, parenchymal  
129 destruction (*i.e.*, emphysema) and connective-tissue deposition in the small airway walls (1). This  
130 latter, also called peribronchiolar fibrosis, has been observed even in young smokers (8), thus  
131 suggesting that it may be an initiating event in COPD pathophysiology. To date, these processes  
132 are not inhibited or reversed by current pharmacotherapy.

133 Fibrocytes are fibroblast-like cells produced by the bone marrow stroma and released in the  
134 peripheral circulation (9). Circulating fibrocytes, defined as CD45<sup>+</sup> collagen I<sup>+</sup> cells, are increased  
135 in COPD patients only during an exacerbation (10) and not in stable state, as compared to control  
136 subjects (10, 11). A high blood fibrocytes concentration during an exacerbation is associated with  
137 an increased risk of death (10), suggesting a deleterious role of fibrocytes in COPD evolution. By  
138 contrast, myeloid derived suppressor cells (MDSC)-like fibrocytes, a subpopulation of circulating  
139 fibrocytes, are increased in the blood of stable COPD patients, and these cells might rather play a  
140 protective role (11). The presence and the role of fibrocytes in the lung of COPD patients remain  
141 controversial (11) and need to be clarified. Indeed, tissue fibrocytes, defined as CD34<sup>+</sup> collagen I<sup>+</sup>  
142 cells, have not been found in distal airways of COPD patients, and detected in proximal airways of  
143 only less than 50% of COPD patients (11). However, fibrocytes are known to downregulate CD34

144 expression when differentiating (12). Thus, the co-expression of CD34 and collagen I, as a  
145 definition criterion for tissue fibrocyte, may lead to fibrocytes underestimation (11). As a  
146 consequence, we define fibrocytes as cells double positive for both CD45 and fibroblast-specific  
147 protein 1 (FSP1), in agreement with previous reports from human (13) and mice (14-16) lungs.  
148 Thus, the aim of the present study was to determine the density of tissue fibrocytes (*i.e.*, CD45<sup>+</sup>  
149 FSP1<sup>+</sup> cells) in distal and proximal airway specimens of COPD patients, as compared to that in  
150 control subjects. We then evaluated the relationship between the density of tissue fibrocytes and  
151 parameters derived from lung function test and quantitative computed tomography (CT) as well as  
152 with blood fibrocytes. Functional *in vitro* experiments were also performed to assess the effect of  
153 epithelial microenvironment on fibrocyte survival.

154

## 155 **Methods**

156 A more detailed description of methods is provided in the online supplement.

157

## 158 **Study populations**

159 Subjects aged more than 40 years were eligible for enrolment if they required thoracic surgery  
160 lobectomy for cancer pN0, lung transplantation or lung volume reduction. A total of 17 COPD  
161 patients, with a clinical diagnosis of COPD according to the GOLD guidelines (2) and 25 non  
162 COPD subjects (“control subjects”) with normal lung function testing (*i.e.*, FEV<sub>1</sub>/FVC > 0.70) and  
163 no chronic symptoms (cough or expectoration) were recruited from the University Hospital of  
164 Bordeaux.

165 To study fibrocytes *in vitro*, blood samples were obtained from a separate cohort of COPD patients,  
166 the COBRA cohort (“Cohorte Obstruction Bronchique et Asthme”; Bronchial Obstruction and



167 Asthma Cohort; sponsored by the French National Institute of Health and Medical Research,  
168 INSERM) (Tables E3 and E5).

169

## 170 **Study design**

171 This clinical trial was sponsored by the University Hospital of Bordeaux. The study has been  
172 registered at ClinicalTrials.gov under the N° NCT01692444 (*i.e.* “Fibrochir” study). The study  
173 protocol was approved by the local research ethics committee on May 30, 2012 and the French  
174 National Agency for Medicines and Health Products Safety on May 22, 2012. All subjects provided  
175 written informed consent. The study design is summarized in Fig E1. 4 visits were scheduled: a  
176 pre-inclusion visit (V1) to explain study and surgery, an inclusion visit (V2) the day of surgery, a  
177 visit one month  $\pm$  15 days after surgery (V3), and a the last visit one year  $\pm$  15 days after surgery  
178 (V4).

179

## 180 **Bronchial fibrocytes identification**

181 A sub-segmental bronchus sample (for proximal tissue) as well as fragments of distal parenchyma  
182 were obtained from macroscopically normal lung resection material. The samples were embedded  
183 in paraffin and sections of 2.5  $\mu$ m thick and were stained with both rabbit anti-FSP1 polyclonal  
184 antibody (Agilent) and mouse anti-CD45 monoclonal antibody (BD Biosciences, San Jose, CA),  
185 or mouse anti-CD3 monoclonal antibody (Agilent), mouse anti-CD19 monoclonal (Agilent),  
186 mouse anti-CD34 monoclonal antibody (Agilent). The sections were imaged using a slide scanner  
187 Nanozoomer 2.0HT (Hamamatsu Photonics, Massy, France). Quantification of dual positive cells  
188 for FSP1 and CD45 was performed as described in Fig 1. The density of FSP1<sup>+</sup> CD45<sup>+</sup> cells was  
189 defined by the ratio between the numbers of dual positive cells in the lamina propria divided by  
190 lamina propria area. Quantification of dual positive cells for FSP1 and CD3, FSP1 and CD19 or

191 FSP1 and CD34 was performed, as described above with some modification (see Supplemental  
192 Material and Methods in the online data supplement). Tissue area and cell measurements were all  
193 performed in a blinded fashion for patients' characteristics.

194  
195 **Quantitative computed tomography**  
196 CT scans were performed on a Somatom Sensation Definition 64 (Siemens, Erlangen, Germany)  
197 at full inspiration and expiration and analyzed using dedicated and validated software, as described  
198 previously (17-20)

199  
200 **Circulating fibrocytes identification**  
201 Non-adherent non-T (NANT) cells were purified from Peripheral Blood Mononuclear Cells  
202 (PBMC) separated from the whole blood, and circulating fibrocytes were identified as double  
203 positive cells for the surface marker CD45 and the intracellular marker collagen I by flow  
204 cytometry, as described previously (10).

205 **Bronchial epithelial supernatants**  
206 Human bronchial epithelial cells (BEC) were derived from bronchial specimens (see Table E4 for  
207 patients' characteristics), as described previously (21). Basal epithelial supernatant from fully  
208 differentiated epithelium was collected for further experiments.

209  
210 **Fibrocyte differentiation and survival**  
211 NANT cells purified from blood samples of COPD patients (Table E3 and E5) were incubated  
212 during one week in DMEM (Fisher Scientific) supplemented with 20% fetal calf serum (Biowest,  
213 Riverside, USA), followed by another week in serum-free medium, or serum-free medium

214 containing 50% of basal epithelial supernatant. After 2 weeks in culture, the cells were detached  
215 by accutase (Fisher Scientific), and either fixed overnight with Cytofix/Cytoperm and stained to  
216 assess CD45, FSP1 and collagen I expression or directly stained by propidium iodide (PI) to assess  
217 the level of dead cells (PI<sup>+</sup> cells), by flow cytometry.

218

### 219 **Statistical analysis**

220 Values are presented as means  $\pm$  SD or the medians (95% confidence interval [CI]). Statistical  
221 significance, defined as  $P < 0.05$ , was analyzed by Fisher's exact tests for comparison of  
222 proportions, by two-sided independent t-tests for variables with a parametric distribution, and, by  
223 Wilcoxon tests, Mann–Whitney U tests and Spearman correlation coefficients for variables with a  
224 non-parametric distribution. Receiver operating characteristic (ROC) analysis and a univariate  
225 logistic regression analysis was performed to evaluate the association between COPD and a high  
226 density of tissue fibrocytes.

227

228

## 229 **Results**

### 230 **Study population**

231 The number of patients enrolled, excluded or followed for up to 1 year after surgery is shown in  
232 supplemental Fig E1. Clinical and functional characteristics, as well as quantitative CT parameters  
233 of all subjects with tissue fibrocytes assessment are shown in Table 1. The groups of control and  
234 COPD patients were well matched for age and body mass index. As expected, COPD patients were  
235 significantly different from controls in terms of smoking habits, lung function (FEV<sub>1</sub>, FVC,  
236 FEV<sub>1</sub>/FVC ratio, RV), diffusing capacity (TLCO) and CT parameters including wall thickness,  
237 emphysema extent (LAA), air trapping (MLA E) and cross-sectional pulmonary vessel area and  
238 number (CSA, CSN) (Table 1).

239

### 240 **Bronchial fibrocytes are increased in COPD patients**

241 As a methodological control, we first cultured fibrocytes from blood samples coming from a  
242 separate cohort of COPD patients (Table E3), and we showed that virtually all the CD45<sup>+</sup> FSP1<sup>+</sup>  
243 cells (99.9 ± 0.06%) purified from circulating PBMC also express collagen I after 14 days of cell  
244 differentiation *in vitro* (Fig E2). This allows us to define tissue fibrocytes as CD45<sup>+</sup> FSP1<sup>+</sup> cells.  
245 These cells were identified by immunohistochemistry as shown in Fig 1, and they were detected in  
246 distal tissue specimens from 11 of 12 COPD patients (92%) and 13 of 20 control subjects (65%)  
247 (Fig 2) as well as in proximal tissue specimens from 14 of 14 COPD patients (100%) and 16 of 21  
248 control subjects (76%) (Fig 3).

249 These fibrocytes were located in the sub-epithelial region of both distal and proximal airways (Figs  
250 2A and 3A) and, occasionally, within the epithelial layer. No CD45<sup>+</sup> FSP1<sup>+</sup> cell was evidenced  
251 within the airway smooth muscle layer. Some tissue fibrocytes were found in peribronchial area  
252 outside the smooth muscle layer (Fig E3). However, the analysis of fibrocyte density in this latter

253 region could not be performed systematically, since this area could not be identified in each of our  
254 tissue specimens. The density of bronchial fibrocytes was higher in the subepithelial region of distal  
255 airways from COPD patients (median = 133 cells/ $\mu\text{m}^2$  (95% CI, 40 to 469), n = 12) than in that of  
256 control subjects (median = 42 cells/ $\mu\text{m}^2$  (95% CI, 31 to 114), n = 20, P<0.05) (Fig 2B). Similarly,  
257 fibrocytes density was also increased in the proximal airways from COPD patients (median = 73  
258 cells/ $\mu\text{m}^2$  (95% CI, 47 to 139), n = 14) compared with control subjects (median = 21 cells/ $\mu\text{m}^2$   
259 (95% CI, 18 to 60), n = 21, P<0.05) (Fig 3B). In both distal and proximal airways, there was no  
260 difference in sub-epithelial areas considered for tissue fibrocytes quantification between COPD  
261 patients and control subjects (Figs 2C and 3C). Not surprisingly, however, the density of fibrocytes  
262 in the sub-epithelial area of proximal tissue was positively and significantly correlated with that  
263 measured in distal airways (Fig E4).

264 To further confirm our results, we co-stained FSP1 with CD3 or CD19 to determine whether FSP1  
265 positive cells could be T-lymphocytes or B-lymphocytes, respectively. Except for one control  
266 subject, very few CD3<sup>+</sup> cells also expressed FSP1 (Fig E5A), and there was no significant  
267 difference in the density of CD3<sup>+</sup> FSP1<sup>+</sup> cells in the sub-epithelial region of distal airways between  
268 controls and COPD patients (Fig E5B-C). Likewise, this density was not statistically different  
269 between both groups in proximal airways (Fig E5D-E). The B-lymphocyte CD19 marker co-  
270 localized with FSP1 positive cells neither in distal (Fig E6A) nor in proximal (Fig E6B) tissue  
271 specimens. We also co-immunostained CD34 and FSP1. CD34<sup>+</sup> FSP1<sup>+</sup> cells were detected in distal  
272 tissue specimens, from only 2 of 12 COPD patients (17%) and 4 of 20 control subjects (20%) (Fig  
273 E7). CD34<sup>+</sup> FSP1<sup>+</sup> cells were found in proximal tissue specimens from 9 of 13 COPD patients  
274 (69%) and 11 of 21 control subjects (52%) (Fig E8), but the density of these cells in COPD patients  
275 (median = 0.5 cells/ $\mu\text{m}^2$  (95% CI, 0.1 to 1.7), n = 13) was very low compared with that of CD45<sup>+</sup>  
276 FSP1<sup>+</sup> cells (median = 73 cells/ $\mu\text{m}^2$  (95% CI, 47 to 139), n=14) (Fig 2B). In both distal and

277 proximal airways, there was no difference in the density of CD34<sup>+</sup> FSP1<sup>+</sup> cells between COPD  
278 patients and control subjects (Figs E7 and E8).

279

### 280 **Relationships between bronchial fibrocytes density and functional and CT parameters**

281 We first determined univariate correlation coefficients between the density of tissue fibrocytes in  
282 the subepithelial region of both distal and proximal airways and various functional and CT  
283 parameters (Tables E1 and E2). In distal tissue specimens, the density of fibrocytes was negatively  
284 correlated to FEV<sub>1</sub>/FVC ratio (Fig 4A) and positively to PaCO<sub>2</sub> (Fig 4B). It was also significantly  
285 associated with mean lung attenuation value during exhalation (Fig 4C). In proximal tissue  
286 specimens, the density of fibrocytes was negatively correlated to FEV<sub>1</sub> (Fig 4D), FVC (Table E2),  
287 and positively correlated to RV (Table E2), WT4 (Fig 4E), WT5 (Fig 4F), WA4% (Table E2).

288 Receiver Operator Characteristic (ROC) curves were built for all subjects whose density of tissue  
289 fibrocytes has been assessed in distal (n=12 COPD patients and 20 control subjects, Fig 5A) and  
290 proximal (n=14 COPD patients and 21 control subjects, Fig 5B) tissue specimens with significant  
291 areas under the curves (Table 2). To predict COPD, the density of fibrocytes in distal airways has  
292 a sensitivity of 83% and a specificity of 70%, whereas this density has a sensitivity of 79% and a  
293 specificity of 67% in proximal airways (Table 2). Moreover, the negative predictive value to  
294 eliminate COPD was 97.5% and 96.6% for distal and proximal airways, respectively, using a  
295 prevalence of 10% for COPD in the general population (22). ROC analyses allowed us to select  
296 the optimal value of fibrocytes density (cut-off values of 72 and 32 for distal and proximal tissue,  
297 respectively) to classify patients either with a high or low level of tissue fibrocytes (Table 2). COPD  
298 was associated with a high density of fibrocytes in distal (odds ratio: 11.7; 95% CI: [1.9-70.2]; P <  
299 0.05) and proximal (odds ratio: 7.3; 95% CI: [1.5-35.1]; P < 0.05) airways. Thus, a high tissue  
300 fibrocytes density is associated with a higher risk of COPD.

301  
302 **Circulating fibrocytes are unchanged in stable COPD**  
303 The percentage of blood fibrocytes (CD45<sup>+</sup> ColI<sup>+</sup> cells) in PBMC, was not statistically different in  
304 stable COPD patients (median=10.3% (95% CI, 4.6 to 16.5) of PBMC, n=12) and control subjects  
305 (median=7.9% (95% CI, 4.1 to 11.6) of PBMC, n=22) (Fig E9A). A similar result was obtained  
306 when fibrocytes concentration is expressed as absolute counts per milliliter of blood (data not  
307 shown). Finally, the percentage of blood fibrocytes (*i.e.*, CD45<sup>+</sup> ColI<sup>+</sup> cells) in PBMC was  
308 significantly correlated with the density of bronchial fibrocytes (*i.e.*, CD45<sup>+</sup> FSP1<sup>+</sup> cells) in distal  
309 airways (Fig E9B).

310  
311 **COPD epithelial supernatant favors fibrocytes survival**  
312 We next investigated whether secretion from bronchial epithelial cells (BEC) from control or  
313 COPD patients could affect fibrocytes viability or ECM secretion in an *in vitro* assay. We evaluated  
314 this effect using BEC obtained from lung resection material sampled either in control subjects (n=2)  
315 or in COPD patients (n=2) (Table E4), cultured at the air-liquid interface. Fibrocytes were cultured  
316 from blood samples coming from a separate cohort of 6 COPD patients (Table E5). 7 to 10 days  
317 after blood sampling, cells, almost all being CD45<sup>+</sup> FSP1<sup>+</sup> cells ( $94.9 \pm 3.6\%$ ), were exposed during  
318 7 days to a mixture of fully differentiated BEC supernatants coming either from control subjects  
319 or COPD patients. 7 days after initial exposure, the level of CD45<sup>+</sup> FSP1<sup>+</sup> cells remains high ( $92.9$   
320  $\pm 3.9\%$  and  $93.4 \pm 3.3\%$  respectively for the control and COPD conditions). However, exposure of  
321 fibrocytes to COPD epithelial supernatant significantly decreased the percentage of dying cells  
322 (Fig E10).

323

## 324 **Discussion**

325 In the present study, we have shown that the density of tissue fibrocytes (*i.e.*, CD45<sup>+</sup> FSP1<sup>+</sup> cells)  
326 is significantly greater in both distal and proximal airway specimens of COPD patients, as  
327 compared to that of control subjects. We also found a significant correlation between this tissue  
328 fibrocytes density with blood fibrocytes as well as airflow obstruction, increased wall thickness, or  
329 air trapping. By means of ROC curve analysis and univariate logistic regression analysis, we  
330 observed that a high density of tissue fibrocyte increases the likelihood of COPD. Finally, it appears  
331 that fibrocytes survival is increased by epithelial cells secretion from COPD patients, a mechanism  
332 that could contribute to the elevated sub-epithelial density of fibrocytes in COPD patients.

333  
334 There is an discrepancy between the present results and those previously obtained by Wright and  
335 colleagues (11), which deserves some methodological discussion. Wright *et al* did not find an  
336 increased level of tissue fibrocytes in COPD patients. They did not even observe any fibrocyte in  
337 distal airways (11). However, the methodology of tissue fibrocytes assessment and, ultimately, the  
338 definition of fibrocytes, are different in the present study and in that of Wright *et al* (11). Wright  
339 and colleagues' method relied on the identification of CD34 and collagen I staining on sequential,  
340 instead of identical, sections (11) which could lead to either, false fibrocytes identification because  
341 of apparent co-expression in closely apposed but not identical cells, or fibrocytes underestimation  
342 because of the absence of co-expression in cells that are present only in one section. We have  
343 carefully addressed this issue by using antibodies and chromogens that are compatible with co-  
344 immunostaining in the same section. We have thus developed an image analysis technique that  
345 unambiguously identifies fibrocytes. Moreover, defining tissue fibrocytes as CD34<sup>+</sup> collagen I<sup>+</sup>  
346 cells (11) may lead to fibrocytes underestimation, which is consistent with previous data showing  
347 a downregulation of CD34 expression when fibrocytes differentiate in culture (12). In the



348 connection, the present data confirming the very low density of CD34<sup>+</sup> FSP1<sup>+</sup> cells in bronchial  
349 specimens thus are in agreement with those of Wright *et al.* Fibrocytes are commonly defined as  
350 cells co-expressing CD45 and collagen I (23). The expression of a hematopoietic marker, such as  
351 CD45, is one of the minimum criteria for fibrocyte identification (23) and has been used in the  
352 present study. However, since immunohistochemistry for collagen I fails to unambiguously  
353 identify collagen I<sup>+</sup> cells in our experiments (data not shown), as well as in another report (24), we  
354 rather used the FSP1 marker, as a co-marker with CD45 for fibrocyte identification, as previously  
355 extensively described (13-16). FSP1 (25), also known as S100A4, is used as a marker for lung  
356 fibroblasts (24). Most of pulmonary FSP1<sup>+</sup> cells express collagen I (24, 26), and the number of  
357 FSP1<sup>+</sup> cells correlates with the extent of lung fibrosis in a murine model of fibrosis, suggesting that  
358 these cells contribute to collagen deposition (24). In addition, we have shown that almost all the  
359 CD45<sup>+</sup> FSP1<sup>+</sup> cells purified from circulating PBMC also express collagen I after 14 days of cell  
360 differentiation *in vitro* (Fig E2). It thus appears that the term of tissue fibrocyte is more accurate  
361 for double positive cells for CD45 and FSP1. Since FSP1 expression has been initially identified  
362 in fibroblasts (25) but was subsequently characterized in immune cells such as T and B  
363 lymphocytes (13), we paid a special attention to co-immunostain FSP1 with CD3, or CD19. In  
364 doing this, we showed that T lymphocytes co-expressing CD3 and FSP1 represented only a minor  
365 subset of CD45<sup>+</sup> FSP1<sup>+</sup> cells, the density of which did not change in COPD patients. We also  
366 showed that no B lymphocyte co-expressing CD19 and FSP1 was present in either distal or  
367 proximal human bronchi from both control subjects and COPD patients. Finally, FSP1 expression  
368 has also been characterized in macrophages (26). However, numerous macrophage markers, such  
369 as CD68, CD163, CD204, CD206, CD209 are also expressed by fibrocytes (27-29). It is thus  
370 impossible to properly differentiate fibrocytes from macrophages using immunohistochemistry  
371 even if a collagen I<sup>+</sup> CD45<sup>+</sup> double staining would have been suitable.

372  
373 Our results may argue in favor of a potential deleterious role of tissue fibrocytes in COPD. Indeed,  
374 the greater the density of bronchial fibrocytes, the lower the FEV1 value or the FEV1/FVC ratio.  
375 Likewise, the greater the density of bronchial fibrocytes, the larger the bronchial wall thickness or  
376 the pulmonary air trapping. We previously pointed out a potential detrimental role of blood  
377 fibrocytes, since a high concentration of fibrocytes, in the peripheral circulation of COPD patients  
378 during an acute exacerbation, was associated with a higher mortality (10). Moreover, blood  
379 fibrocytes were present at a high level in frequent exacerbating patients (10). Since small airways  
380 are the major site of airway obstruction in COPD (30-32), the observation that tissue fibrocytes  
381 density, assessed in the present study, was higher in distal than in proximal airways makes sense.  
382 The correlation between the concentration of circulating fibrocytes and the density of distal  
383 bronchial fibrocytes may indicate that fibrocytes, which are recruited in the blood during an acute  
384 exacerbation (10), subsequently migrate to the airways and participate to the tissue remodeling  
385 process, such as peribronchial fibrosis leading to airway obstruction and air trapping. Indeed, once  
386 recruited into the lungs, fibrocytes may play various roles, including matrix secretion and  
387 degradation, pro-fibrotic cytokines production and activation of contractile force (33). Finally, the  
388 lower number of cell death in fibrocytes cultured with BEC from COPD patients combined with  
389 the elevated density of fibrocytes at the proximity of the epithelium in tissue samples from COPD  
390 patients, would suggest that secretion from epithelial cells in a COPD microenvironment provide  
391 pro-survival signals for tissue fibrocytes and could explain, at least partially, bronchial  
392 accumulation of fibrocytes in COPD patients. However, continuous efforts are warranted to clarify  
393 the cellular mechanisms by which fibrocytes may participate to obstruction development.  
394

395 The present study has some limitations, which deserve further comments. The specimens for  
396 fibrocytes detection were obtained from patients with a diagnosis of lung cancer in 37 of 42  
397 patients. As FSP1 is often expressed in malignant cells (34, 35), one may suggest that it could have  
398 an impact on fibrocytes density measured in our study. Since (i) bronchial specimens for fibrocytes  
399 analysis were selected from macroscopically normal lung resection material, and (ii) patients with  
400 a staging different from pN0 confirmed after surgery were excluded, it is unlikely that malignancy  
401 would have been sufficient to explain the increase in fibrocytes density we observed in COPD  
402 patients.

403

404 In conclusion, by taking advantage of unambiguous fibrocytes identification by co-immunostaining  
405 and image analysis, we unveil that COPD patients exhibit a greater density of fibrocytes in distal  
406 and proximal airways than control subjects. A high density of tissue fibrocytes is associated with  
407 a degraded lung function, airway structural changes and a higher risk of COPD, suggesting a  
408 deleterious pathogenic role for fibrocytes in COPD.

409 **Acknowledgments**

410 The authors thank the study participants, the staff of thoracic surgery, radiology, pathology,  
411 respiratory and lung function testing departments from the University Hospital of Bordeaux,  
412 Virginie Niel for technical assistance, the Bordeaux Imaging Center (BIC) for help with imaging  
413 and image analysis. Microscopy was done in the Bordeaux Imaging Center a service unit of the  
414 CNRS-INSERM and Bordeaux University, member of the national infrastructure France  
415 BioImaging supported by the French National Research Agency (ANR-10-INBS-04). The help of  
416 Christel Poujol, Sébastien Marais and Fabrice Cordelières for imaging and the help of Muriel  
417 Cario-André for immunohistochemistry are acknowledged.

## 418 References

- 419 1. Hogg JC, Chu F, Utokaparch S, Woods R, Elliott WM, Buzatu L, Cherniack RM, Rogers RM, Sciruba  
420 FC, Coxson HO, Pare PD. The nature of small-airway obstruction in chronic obstructive pulmonary  
421 disease. *N Engl J Med* 2004; 350: 2645-2653.
- 422 2. GOLD 1998. Global Initiative for Chronic Obstructive Lung Disease. Global Strategy for the Diagnosis,  
423 Management and Prevention of Chronic Obstructive Pulmonary Disease. NIH Publication (updated  
424 2011). Accessed May 1, 2012, at <http://www.goldcopd.org>.
- 425 3. Wedzicha JA, Donaldson GC. Exacerbations of chronic obstructive pulmonary disease. *Respir Care* 2003;  
426 48: 1204-1213; discussion 1213-1205.
- 427 4. Soler-Cataluna JJ, Martinez-Garcia MA, Roman Sanchez P, Salcedo E, Navarro M, Ochando R. Severe  
428 acute exacerbations and mortality in patients with chronic obstructive pulmonary disease. *Thorax*  
429 2005; 60: 925-931.
- 430 5. Calverley PM, Anderson JA, Celli B, Ferguson GT, Jenkins C, Jones PW, Yates JC, Vestbo J. Salmeterol  
431 and fluticasone propionate and survival in chronic obstructive pulmonary disease. *N Engl J Med*  
432 2007; 356: 775-789.
- 433 6. Tashkin D, Celli B, Senn S, Burkhart D, Kesten S, Menjoge S, Decramer M. A 4-year trial of tiotropium  
434 in chronic obstructive pulmonary disease (UPLIFT trial). *Rev Port Pneumol* 2009; 15: 137-140.
- 435 7. Vestbo J, Anderson JA, Brook RD, Calverley PM, Celli BR, Crim C, Martinez F, Yates J, Newby DE,  
436 Investigators S. Fluticasone furoate and vilanterol and survival in chronic obstructive pulmonary  
437 disease with heightened cardiovascular risk (SUMMIT): a double-blind randomised controlled trial.  
438 *Lancet* 2016; 387: 1817-1826.
- 439 8. Niewoehner DE, Kleinerman J, Rice DB. Pathologic changes in the peripheral airways of young cigarette  
440 smokers. *N Engl J Med* 1974; 291: 755-758.
- 441 9. Bucala R, Spiegel LA, Chesney J, Hogan M, Cerami A. Circulating fibrocytes define a new leukocyte  
442 subpopulation that mediates tissue repair. *Mol Med* 1994; 1: 71-81.
- 443 10. Dupin I, Allard B, Ozier A, Maurat E, Ousova O, Delbrel E, Trian T, Bui HN, Dromer C, Guisset O,  
444 Blanchard E, Hilbert G, Vargas F, Thumerel M, Marthan R, Girodet PO, Berger P. Blood fibrocytes  
445 are recruited during acute exacerbations of chronic obstructive pulmonary disease through a  
446 CXCR4-dependent pathway. *J Allergy Clin Immunol* 2016; 137: 1036-1042 e1037.
- 447 11. Wright AK, Newby C, Hartley RA, Mistry V, Gupta S, Berair R, Roach KM, Saunders R, Thornton T,  
448 Shelley M, Edwards K, Barker B, Brightling CE. MDSC-like fibrocytes are increased and  
449 associated with preserved lung function in COPD. *Allergy* 2016.
- 450 12. Schmidt M, Sun G, Stacey MA, Mori L, Mattoli S. Identification of circulating fibrocytes as precursors  
451 of bronchial myofibroblasts in asthma. *J Immunol* 2003; 171: 380-389.
- 452 13. Mitsuhashi A, Goto H, Saijo A, Trung VT, Aono Y, Ogino H, Kuramoto T, Tabata S, Uehara H, Izumi  
453 K, Yoshida M, Kobayashi H, Takahashi H, Gotoh M, Kakiuchi S, Hanibuchi M, Yano S, Yokomise  
454 H, Sakiyama S, Nishioka Y. Fibrocyte-like cells mediate acquired resistance to anti-angiogenic  
455 therapy with bevacizumab. *Nat Commun* 2015; 6: 8792.
- 456 14. Sangaletti S, Tripodo C, Cappetti B, Casalini P, Chiodoni C, Piconese S, Santangelo A, Parenza M,  
457 Arioli I, Miotti S, Colombo MP. SPARC oppositely regulates inflammation and fibrosis in  
458 bleomycin-induced lung damage. *Am J Pathol* 2011; 179: 3000-3010.
- 459 15. Rock JR, Barkauskas CE, Cronic MJ, Xue Y, Harris JR, Liang J, Noble PW, Hogan BL. Multiple  
460 stromal populations contribute to pulmonary fibrosis without evidence for epithelial to  
461 mesenchymal transition. *Proc Natl Acad Sci U S A* 2011; 108: E1475-1483.
- 462 16. Aono Y, Kishi M, Yokota Y, Azuma M, Kinoshita K, Takezaki A, Sato S, Kawano H, Kishi J, Goto H,  
463 Uehara H, Izumi K, Nishioka Y. Role of platelet-derived growth factor/platelet-derived growth  
464 factor receptor axis in the trafficking of circulating fibrocytes in pulmonary fibrosis. *Am J Respir  
465 Cell Mol Biol* 2014; 51: 793-801.

- 466 17. Coste F, Dournes G, Dromer C, Blanchard E, Freund-Michel V, Girodet PO, Montaudon M, Baldacci  
467 F, Picard F, Marthan R, Berger P, Laurent F. CT evaluation of small pulmonary vessels area in  
468 patients with COPD with severe pulmonary hypertension. *Thorax* 2016; 71: 830-837.
- 469 18. Dournes G, Laurent F, Coste F, Dromer C, Blanchard E, Picard F, Baldacci F, Montaudon M, Girodet  
470 PO, Marthan R, Berger P. Computed tomographic measurement of airway remodeling and  
471 emphysema in advanced chronic obstructive pulmonary disease. Correlation with pulmonary  
472 hypertension. *Am J Respir Crit Care Med* 2015; 191: 63-70.
- 473 19. Girodet PO, Dournes G, Thumerel M, Begueret H, Dos Santos P, Ozier A, Dupin I, Trian T, Montaudon  
474 M, Laurent F, Marthan R, Berger P. Calcium Channel Blocker Reduces Airway Remodeling in  
475 Severe Asthma. A Proof-of-Concept Study. *Am J Respir Crit Care Med* 2015; 191: 876-883.
- 476 20. Montaudon M, Berger P, de Dietrich G, Braquelaire A, Marthan R, Tunon-de-Lara JM, Laurent F.  
477 Assessment of airways with three-dimensional quantitative thin-section CT: in vitro and in vivo  
478 validation. *Radiology* 2007; 242: 563-572.
- 479 21. Trian T, Allard B, Dupin I, Carvalho G, Ousova O, Maurat E, Bataille J, Thumerel M, Begueret H,  
480 Girodet PO, Marthan R, Berger P. House dust mites induce proliferation of severe asthmatic smooth  
481 muscle cells via an epithelium-dependent pathway. *Am J Respir Crit Care Med* 2015; 191: 538-  
482 546.
- 483 22. Halbert RJ, Natoli JL, Gano A, Badamgarav E, Buist AS, Mannino DM. Global burden of COPD:  
484 systematic review and meta-analysis. *Eur Respir J* 2006; 28: 523-532.
- 485 23. Reilkoff RA, Bucala R, Herzog EL. Fibrocytes: emerging effector cells in chronic inflammation. *Nat*  
486 *Rev Immunol* 2011; 11: 427-435.
- 487 24. Lawson WE, Polosukhin VV, Zoia O, Stathopoulos GT, Han W, Plieth D, Loyd JE, Neilson EG,  
488 Blackwell TS. Characterization of fibroblast-specific protein 1 in pulmonary fibrosis. *Am J Respir*  
489 *Crit Care Med* 2005; 171: 899-907.
- 490 25. Strutz F, Okada H, Lo CW, Danoff T, Carone RL, Tomaszewski JE, Neilson EG. Identification and  
491 characterization of a fibroblast marker: FSP1. *J Cell Biol* 1995; 130: 393-405.
- 492 26. Inoue T, Plieth D, Venkov CD, Xu C, Neilson EG. Antibodies against macrophages that overlap in  
493 specificity with fibroblasts. *Kidney Int* 2005; 67: 2488-2493.
- 494 27. Hu X, DeBiasi EM, Herzog EL. Flow Cytometric Identification of Fibrocytes in the Human Circulation.  
495 *Methods Mol Biol* 2015; 1343: 19-33.
- 496 28. Pilling D, Fan T, Huang D, Kaul B, Gomer RH. Identification of markers that distinguish monocyte-  
497 derived fibrocytes from monocytes, macrophages, and fibroblasts. *PLoS One* 2009; 4: e7475.
- 498 29. Bianchetti L, Barczyk M, Cardoso J, Schmidt M, Bellini A, Mattoli S. Extracellular matrix remodelling  
499 properties of human fibrocytes. *J Cell Mol Med* 2012; 16: 483-495.
- 500 30. Cosio M, Ghezzi H, Hogg JC, Corbin R, Loveland M, Dosman J, Macklem PT. The relations between  
501 structural changes in small airways and pulmonary-function tests. *N Engl J Med* 1978; 298: 1277-  
502 1281.
- 503 31. Hasegawa M, Nasuhara Y, Onodera Y, Makita H, Nagai K, Fuke S, Ito Y, Betsuyaku T, Nishimura M.  
504 Airflow limitation and airway dimensions in chronic obstructive pulmonary disease. *Am J Respir*  
505 *Crit Care Med* 2006; 173: 1309-1315.
- 506 32. Hogg JC, McDonough JE, Suzuki M. Small airway obstruction in COPD: new insights based on micro-  
507 CT imaging and MRI imaging. *Chest* 2013; 143: 1436-1443.
- 508 33. Dupin I, Contain-Bordes C, Berger P. Fibrocytes in Asthma and COPD: Variations on the Same Theme.  
509 *Am J Respir Cell Mol Biol* 2017.
- 510 34. Ilg EC, Schafer BW, Heizmann CW. Expression pattern of S100 calcium-binding proteins in human  
511 tumors. *Int J Cancer* 1996; 68: 325-332.
- 512 35. Xue C, Plieth D, Venkov C, Xu C, Neilson EG. The gatekeeper effect of epithelial-mesenchymal  
513 transition regulates the frequency of breast cancer metastasis. *Cancer Res* 2003; 63: 3386-3394.  
514

515 **Fig legends**

516 **Fig 1. Detection of CD45<sup>+</sup> FSP1<sup>+</sup> cells.**

517 A, Left column, CD45 (green) and fibroblast-specific protein 1 (FSP1, red) stainings. Middle  
518 column, images for CD45 (top panel) and FSP1 (bottom panel) stainings are obtained after color  
519 deconvolution. Right column, segmented images are obtained for CD45 (top panel) and FSP1  
520 stainings (bottom panel) after segmentation by a binary threshold. B, Merged segmented image. C,  
521 Higher magnification of the segmented image in B. The yellow arrowheads and the white arrows  
522 indicate respectively CD45<sup>+</sup> FSP1<sup>+</sup> cells and CD45<sup>+</sup> cells.

523

524 **Fig 2. Increased fibrocyte density of in distal airways of COPD patients.**

525 A, Representative staining of CD45 (green) and FSP1 (red) in distal bronchial tissue specimens  
526 from control subject (left) and COPD patient (right). The yellow arrowheads indicate fibrocytes,  
527 defined as CD45<sup>+</sup> FSP1<sup>+</sup> cells. B, Quantification of fibrocyte density (normalized by the sub-  
528 epithelial area) in one specimen/patient. \*: P<0.05, Mann Whitney test. C, Comparison of sub-  
529 epithelial areas in control subjects and COPD patients. B, C, medians are represented as horizontal  
530 lines.

531

532 **Fig 3. Increased fibrocyte density in proximal airways of COPD patients.**

533 A, Representative staining of CD45 (green) and FSP1 (red) in proximal bronchial tissue specimens  
534 from control subject (left) and COPD patient (right). The yellow arrowheads indicate fibrocytes,  
535 defined as CD45<sup>+</sup> FSP1<sup>+</sup> cells. B, Quantification of fibrocyte density (normalized by the sub-  
536 epithelial area) in one specimen/patient. \*: P<0.05, Mann Whitney test. C, Comparison of sub-

537 epithelial areas in control subjects and COPD patients. B, C, medians are represented as horizontal  
538 lines.

539  
540 **Fig 4. Relationships between fibrocyte density, lung function parameters and CT parameters.**

541 A-C, Relationships between FEV1/FVC (A), PaO<sub>2</sub> (B), MLA during expiration (C) and the density  
542 of CD45<sup>+</sup> FSP1<sup>+</sup> cells in distal airways measured in control subjects (black circles) and COPD  
543 patients (open circles). D-F, Relationships between FEV1 (D), WT4 (E), WT5 (F) and the density  
544 of CD45<sup>+</sup> FSP1<sup>+</sup> cells in proximal airways measured in control subjects (black circles) and COPD  
545 patients (open circles). Correlation coefficient (r) and significance level (P value) were obtained  
546 by using nonparametric Spearman analysis.

547  
548 **Fig 5. Diagnosis accuracy of high fibrocyte density for COPD**

549 A-B, Receiver operating characteristic (ROC) curves for control subjects and COPD patients with  
550 fibrocyte density measured in distal (A) or proximal (B) tissue specimens was built in order to  
551 predict COPD.

552



**Table 1: Patient characteristics**

|                                          | <b>COPD</b>   | <b>Control</b> | <b>P value</b> |
|------------------------------------------|---------------|----------------|----------------|
| <b>N</b>                                 | 17            | 25             |                |
| Age (yrs.)                               | 66.2 ± 9.5    | 61.7 ± 8.1     | 0.11           |
| Sex (Men/Women)                          | 11/6          | 5/20           | 0.008          |
| Body-mass index (kg/m <sup>2</sup> )     | 24.7 ± 4.1    | 26.5 ± 6.9     | 0.34           |
| Current smoker (Y/N)                     | 2/15          | 10/15          | 0.09           |
| Former smoker (Y/N)                      | 15/2          | 8/17           | 0.0004         |
| Pack years (no.)                         | 43.7 ± 22.8   | 18.1 ± 16.8    | 0.0007         |
| <b>LFT</b>                               |               |                |                |
| FEV <sub>1</sub> (% pred.)               | 57.2 ± 22.5   | 100.0 ± 16.7   | <0.0001        |
| FEV <sub>1</sub> /FVC ratio (%)          | 53.2 ± 16.3   | 78.0 ± 8.0     | <0.0001        |
| FVC (% pred.)                            | 82.0 ± 15.4   | 107 ± 15.8     | <0.0001        |
| RV (% pred)                              | 168 ± 68.8    | 112 ± 27.8     | 0.0007         |
| TLCO (% pred.)                           | 53.4 ± 22.6   | 81.8 ± 20.4    | 0.0003         |
| <b>Six-minute walk test distance (m)</b> | 472 ± 67      | 503 ± 69       | 0.19           |
| <b>Arterial blood gases</b>              |               |                |                |
| PaO <sub>2</sub> (mm Hg)                 | 78.0 ± 11.2   | 85.1 ± 13.2    | 0.08           |
| PaCO <sub>2</sub> (mm Hg)                | 40.7 ± 7.7    | 35.7 ± 2.8     | 0.01           |
| <b>CT parameters</b>                     |               |                |                |
| Bronchi:                                 |               |                |                |
| WA4 %                                    | 4.2 ± 0.4     | 3.8 ± 0.6      | 0.06           |
| WT4 (mm)                                 | 1.7 ± 0.2     | 1.5 ± 0.2      | 0.03           |
| WA5 %                                    | 4.2 ± 0.4     | 3.2 ± 0.4      | <0.0001        |
| WT5 (mm)                                 | 1.5 ± 0.2     | 1.3 ± 0.2      | 0.02           |
| Emphysema:                               |               |                |                |
| LAA (%)                                  | 21.9 ± 16.6   | 4.2 ± 4.0      | <0.0001        |
| Air trapping:                            |               |                |                |
| MLA E (HU)                               | -858 ± 23     | -817 ± 38      | 0.002          |
| MLA I (HU)                               | -865 ± 24     | -821 ± 33      | 0.0001         |
| MLA I-E (HU)                             | -7.5 ± 12     | -7.7 ± 31      | 0.52           |
| Pulmonary vessels:                       |               |                |                |
| %CSA <sub>&lt;5</sub>                    | 0.35 ± 0.10   | 0.54 ± 0.20    | 0.0003         |
| %CSA <sub>5-10</sub>                     | 0.11 ± 0.02   | 0.15 ± 0.04    | 0.0008         |
| CSN <sub>&lt;5</sub>                     | 0.28 ± 0.03   | 0.47 ± 0.19    | 0.0004         |
| CSN <sub>5-10</sub>                      | 0.016 ± 0.004 | 0.023 ± 0.006  | 0.0008         |

553 Plus-minus values are means  $\pm$  SD. LFT, lung function test; FEV<sub>1</sub>, forced expiratory volume in 1  
554 second; FVC, forced vital capacity; RV, residual volume; TLCO, Transfer Lung capacity of Carbon  
555 monoxide, PaO<sub>2</sub>, partial arterial oxygen pressure, PaCO<sub>2</sub>, partial arterial carbon dioxide pressure;  
556 WA, mean wall area; LA, mean lumen area, WA%, mean wall area percentage; WT, wall thickness;  
557 LAA, low-attenuation area; MLA E or I, mean lung attenuation value during expiration or  
558 inspiration. MLA I-E, difference between inspiratory and expiratory mean lung attenuation value.  
559 %CSA<sub><5</sub>, percentage of total lung area taken up by the cross-sectional area of pulmonary vessels  
560 less than 5 mm<sup>2</sup>; %CSA<sub>5-10</sub>, percentage of total lung area taken up by the cross-sectional area of  
561 pulmonary vessels between 5 and 10 mm<sup>2</sup>; CSN<sub><5</sub>, number of vessels less than 5 mm<sup>2</sup> normalized  
562 by total lung area; CSN<sub>5-10</sub>, number of vessels between 5 and 10 mm<sup>2</sup> normalized by total lung  
563 area; NR: not relevant. P values were calculated with the use of a two-sided independent t-test for  
564 variables with a parametric distribution, Fisher's exact test for comparison of proportions, and the  
565 Mann-Whitney U test for comparison of nonparametric variables.  
566

**Table 2: Association of high level of density of tissue fibrocytes with COPD**

| Type of tissue  | n  | AUC $\pm$ SD    | P value | Cut-off value | Sensitivity [IC]    | Specificity [IC]    |
|-----------------|----|-----------------|---------|---------------|---------------------|---------------------|
| <b>Distal</b>   | 32 | 0.76 $\pm$ 0.09 | 0.04    | 72            | 0.83<br>[0.70-0.96] | 0.70<br>[0.54-0.86] |
| <b>Proximal</b> | 35 | 0.72 $\pm$ 0.09 | 0.02    | 32            | 0.79<br>[0.65-0.92] | 0.67<br>[0.51-0.82] |

567

568 Data are absolute number with [95% confidence interval] and plus–minus values are means  $\pm$  SD.

569 AUC, Area Under ROC Curve; ROC, Receiver Operating Characteristic; SD, standard deviation.

570 P values, sensitivity and specificity were evaluated for ROC curve analysis.

571 **Figures**

**Fig 1**

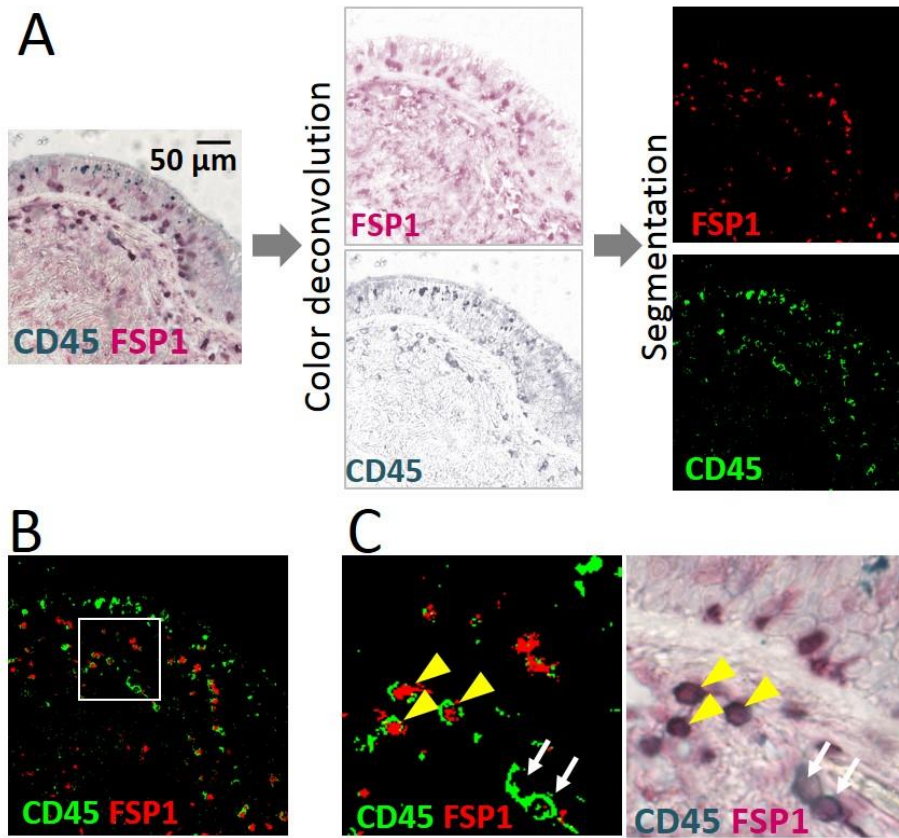

Fig 2

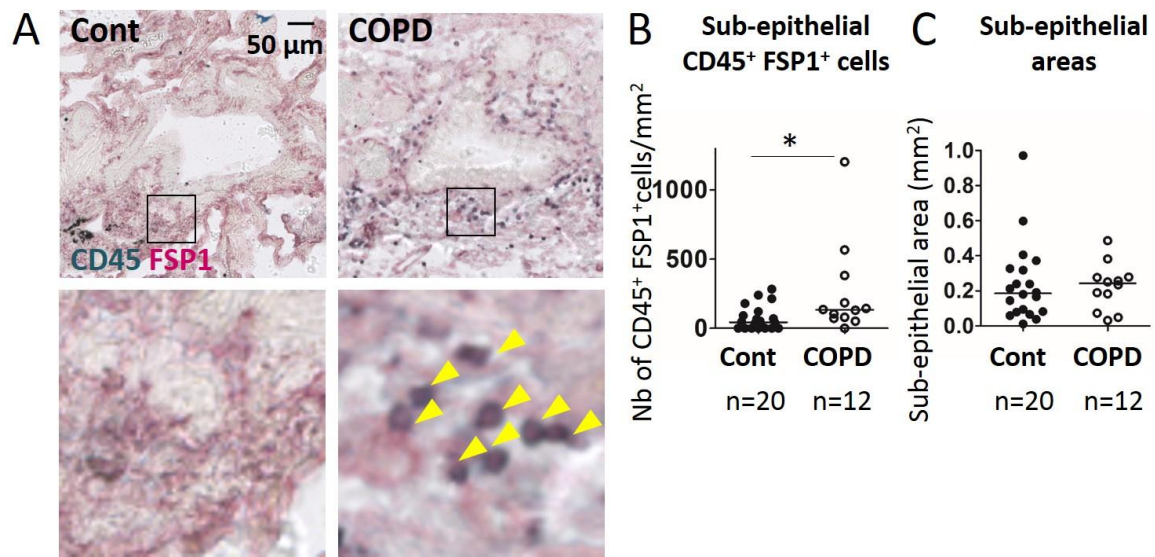

**Fig 3**

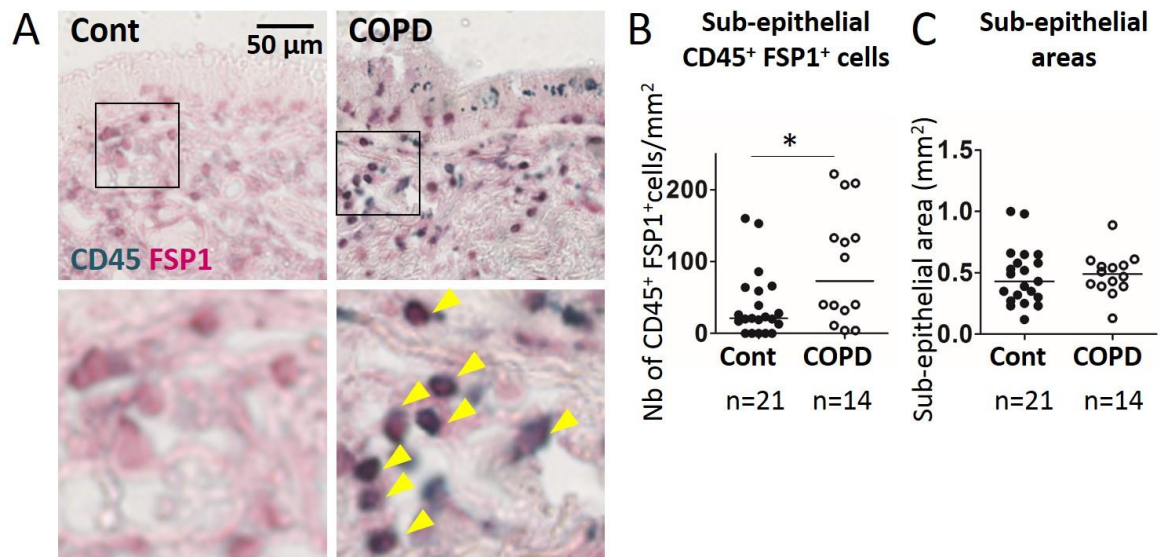

**Fig 4**

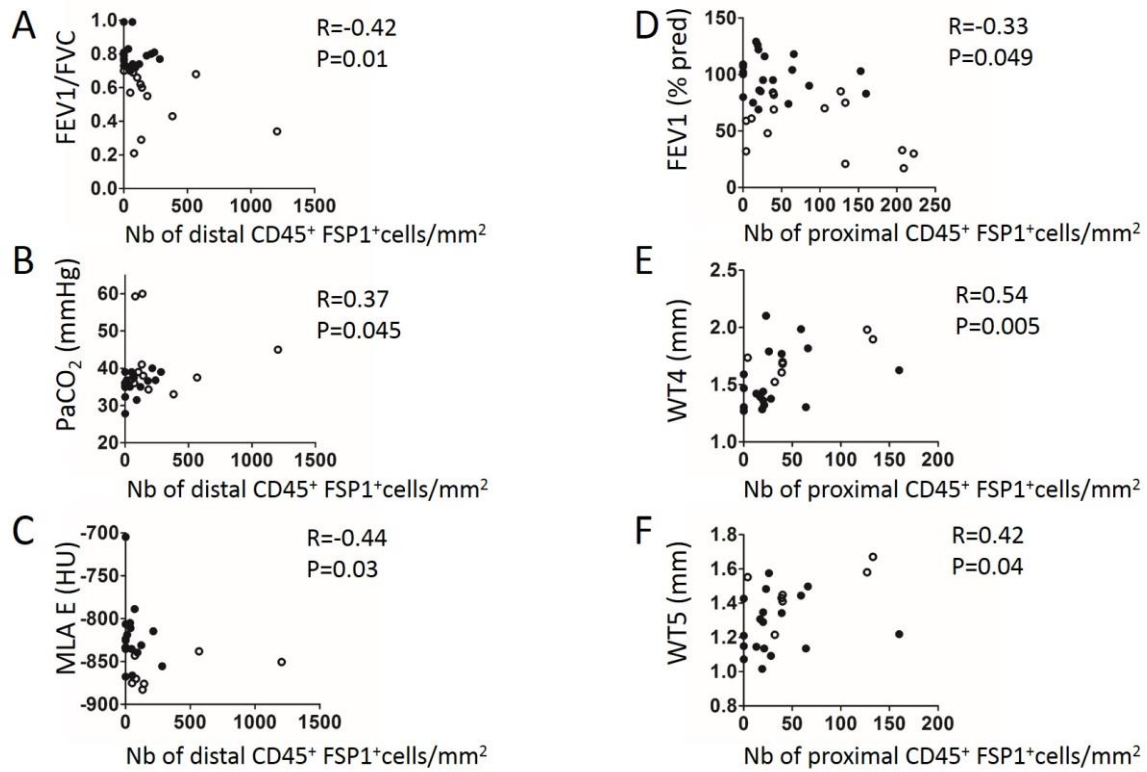

**Fig 5**

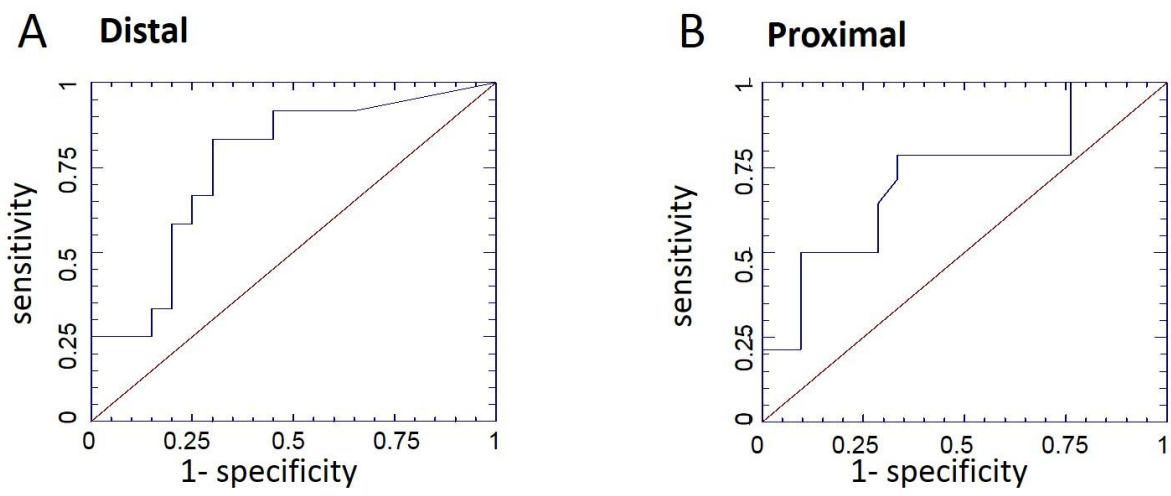



## **Fibrocyte accumulation in bronchi: a cellular hallmark of COPD**

Isabelle Dupin<sup>1,2,\*</sup>, Matthieu Thumerel<sup>1,2,3,\*</sup>, Elise Maurat<sup>1,2</sup>, Florence Coste<sup>1,2</sup>, Hugues Begueret<sup>3</sup>, Thomas Trian<sup>1,2</sup>, Michel Montaudon<sup>1,2,3</sup>, Roger Marthan<sup>1,2,3</sup>, Pierre-Olivier Girodet<sup>1,2,3</sup>, Patrick Berger<sup>1,2,3</sup>

### **Online Data Supplement**

#### **Supplemental Material and Methods**

##### **Study Populations**

Subjects aged more than 40 years were eligible for enrolment if they required thoracic surgery for lobectomy for cancer pN0, lung transplantation or lung volume reduction. A total of 17 COPD patients, with a clinical diagnosis of COPD according to the GOLD guidelines (1) and 25 non COPD subjects (“control subjects”) with normal lung function testing (*i.e.*, FEV<sub>1</sub>/FVC > 0.70) and no chronic symptoms (cough or expectoration) were recruited from the University Hospital of Bordeaux. Main exclusion criteria for both COPD patients and control subjects were history of asthma, lung fibrosis, idiopathic pulmonary hypertension and chronic viral infections (hepatitis, HIV). The main withdrawal criterion for subjects included for lobectomy due to cancer was a staging different from pN0 confirmed after surgery.

To study fibrocyte survival *in vitro*, blood samples were obtained from a separate cohort of COPD patients. These patients were recruited from the COBRA cohort (“Cohorte Obstruction

Bronchique et Asthme”; Bronchial Obstruction and Asthma Cohort; sponsored by the French National Institute of Health and Medical Research, INSERM), as outpatients in the Clinical Investigation Centre of the University Hospital of Bordeaux (Tables E3 and E5).

To assess the role of epithelium on fibrocyte survival *in vitro*, macroscopically normal, lung resection material was ethically obtained by lobectomy from a separate group of patients categorized into COPD and control groups as per GOLD criteria (Table E4).

All subjects provided written informed consent to participate to the study. All clinical data were collected in the Clinical Investigation Center (CIC1401) from the University Hospital of Bordeaux. The study protocol was approved by the research ethics committee (“CPP”) and the French National Agency for Medicines and Health Products Safety (“ANSM”).

## **Study design**

The study protocol was approved by the local research ethics committee on May 30, 2012 and the French National Agency for Medicines and Health Products Safety on May 22, 2012. All clinical investigations have been conducted according to the principles expressed in the Declaration of Helsinki. All subjects provided written informed consent. The clinical trial was conducted from April 2013 (1<sup>st</sup> patient, 1<sup>st</sup> visit) to May 2016 (last patient, last visit). As already indicated, all patients undergoing surgery were thus recruited from the Department of Thoracic Surgery of the University Hospital. The study was sponsored and funded by the University Hospital of Bordeaux (*i.e.* “CHU de Bordeaux”). All authors were academic and made the decision to submit the manuscript for publication and vouch for the accuracy and integrity of the contents. The study has been registered at ClinicalTrials.gov under the N° NCT01692444 (*i.e.* “Fibrochir” study).

The study design is summarized in Fig E1. The pre-inclusion visit (V1) before surgery, consisted of patient information and signature of the informed consent followed by a clinical evaluation (*i.e.*, pulmonary auscultation, assessment of the WHO score, history of previous 12 months, smoking status, current treatment...). A full-body CT-scan with injection, was performed as part of the classical disease management but was preceded by two complementary thoracic acquisitions at expiration and inspiration without injection within the framework of the study. The patients also underwent echocardiography and lung function testing using body plethysmography, lung transfer capacity (TLCO) and arterial gas. The inclusion visit (V2), the day of surgery, consisted of a clinical evaluation (*i.e.*, control assessment test (CAT), St Georges Quality of Life Questionnaire (SGQLQ) and six-minute walk test) and venous blood sample (50 ml) for fibrocytes analysis. After thoracic surgery (lobectomy or pneumonectomy), a pulmonary sample from a grossly normal part of the surgical specimen is included in paraffin for subsequent analysis of the bronchial fibrocytes. Due to low quality of some tissue sections, fibrocyte density quantification was impossible in 10 distal specimens and 7 proximal specimens (Fig E1), which were excluded from peribronchial fibrocyte analysis. During hospital stay, clinical data was collected such as pTNM status for cancer patients. A visit one month  $\pm$  15 days after surgery (V3) consisted of spirometric evaluation. The last visit one year  $\pm$  15 days after surgery (V4) consisted of clinical (CAT, SGQLQ and six-minute walk test) and functional (plethysmography, TLCO, arterial gas) evaluations. COPD patients and control subjects performed the whole series of “Fibrochir” visits, with the exception of 2 COPD patients who provided written informed consent for the use of biological samples and clinical data for research and underwent only two visits (corresponding to V1 and V2) including the surgical pulmonary sample for peribronchial fibrocyte analysis.

## **Bronchial fibrocytes identification**

A sub-segmental bronchus sample (for proximal tissue) as well as fragments of distal parenchyma were obtained from macroscopically normal lung resection material. The samples were embedded in paraffin and sections of 2.5  $\mu\text{m}$  thick were cut, as described previously (2). Sections were deparaffinized through three changes of xylene and through graded alcohols to water. Heat induced antigen retrieval was performed using citrate buffer, pH 6 (Fisher Scientific, Illkirch, France) in a Pre-Treatment Module (Agilent, Les Ulis, France). Endogenous peroxidase and alkaline phosphatases (AP) were blocked for 10 min using Dual Enzyme Block (Diagomics, Blagnac, France). Nonspecific binding was minimized by incubating the sections with 4% Goat Serum (Agilent) for 30 min. The sections were stained with both rabbit anti-FSP1 polyclonal antibody (Agilent) and mouse anti-CD45 monoclonal antibody (BD Biosciences, San Jose, CA), or mouse anti-CD3 monoclonal antibody (Agilent), mouse anti-CD19 monoclonal (Agilent), mouse anti-CD34 monoclonal antibody (Agilent) or appropriate isotype controls, rabbit IgG (Fisher Scientific) and mouse IgG1 (R&D Systems, Lille, France) at the same concentration. For CD45-FSP1 double staining, the sections were re-incubated with HRP-Polymer anti-Mouse and AP Polymer anti-Rabbit antibodies (Diagomics). Sections were developed with the chromogenic substrates, GBI-Permanent Red and Emerald. For CD3-FSP1, CD19-FSP1 and CD34-FSP1 double staining, the sections were re-incubated with HRP anti-Mouse (Agilent) and with Alexa488-conjugated anti-Rabbit (Fisher Scientific) antibodies. Immunoreactivity was detected by using the DAB System (Agilent) for CD3, CD19 or CD34 staining and by fluorescence for FSP1 staining.

The sections were imaged using a slide scanner Nanozoomer 2.0HT with fluorescence imaging module (Hamamatsu Photonics, Massy, France) using objective UPS APO 20X NA 0.75 combined to an additional lens 1.75X, leading to a final magnification of 35X. Virtual slides were acquired with a TDI-3CCD camera. Fluorescent acquisitions were done with a mercury

lamp (LX2000 200W - Hamamatsu Photonics) and the set of filters adapted for DAPI and Alexa 488. Bright field and fluorescence images were acquired with the NDP-scan software (Hamamatsu) and processed with ImageJ. Quantification of dual positive cells for FSP1 and CD45 was performed, as described in Fig 1. A color deconvolution plugin was used on bright field image to separate channels corresponding to GBI-Permanent Red and Emerald double staining, and a binary threshold was then applied to these images (Fig 1A). Tissue fibrocytes were defined as cells dual positive for cytoplasmic FSP1 and plasma membrane CD45 double staining on the merged threshold image (Fig 1B-C). The lamina propria contour was manually determined on bright field image and the area was calculated. For distal bronchi, the lumen area was also determined and only bronchi less than 2 mm in diameter were analyzed as described by J.C. Hogg *et al* (3). The density of FSP1<sup>+</sup> CD45<sup>+</sup> cells was defined by the ratio between the number of dual positive cells in the lamina propria divided by lamina propria area. Quantification of dual positive cells for FSP1 and CD3, FSP1 and CD19 or FSP1 and CD34 was performed, as described above with some modification: a color deconvolution plugin was used on bright field image to select the channel corresponding to DAB signal (for CD3, CD19 or CD34 staining), and a binary threshold was then applied to this image and fluorescence image corresponding to FSP1 staining. Tissue area and cell measurements were all performed in a blinded fashion for patients' characteristics.

### **Quantitative computed tomography**

CT scans were performed on a Somatom Sensation Definition 64 (Siemens, Erlangen, Germany) at full inspiration and expiration, as described previously (4-7). Briefly, quantitative analysis was performed by using dedicated and validated software: Automatic quantification of bronchial wall area (WA), lumen area (LA), WA/LA (WA%) and wall thickness (WT) was

obtained on orthogonal bronchial cross sections by using the Laplacian-of-Gaussian algorithm and homemade software (8, 9); Automatic quantification of both emphysema and air trapping was assessed using Myrian software (Intrasense, Montpellier, France) and both low attenuation area per cent (LAA%) (4, 5) and mean lung attenuation (MLA) during expiration (6, 7); Quantification of pulmonary vessels was obtained from CT images, as previously described (4). Briefly, CT set of images reconstructed with sharp algorithm (B70f) were analyzed by using the ImageJ software version 1.40g (a public domain Java image program available at <http://rsb.info.nih.gov/ij/>). The small pulmonary vessels measurements were made automatically as described elsewhere (4, 10-12). The cross section area (CSA) and cross section number (CSN) of small pulmonary vessels were quantified separately at the subsegmental and at the sub-subsegmental levels (4, 12). The subsegmental and sub-subsegmental levels are defined by a vessel area between 5 and 10 mm<sup>2</sup> and less than 5 mm<sup>2</sup>, respectively. Finally, quantifications were obtained after normalization by the corresponding lung section area at each CT slice: the cross sectional area of small pulmonary vessel less than 5 mm<sup>2</sup> (%CSA<sub><5</sub>). Four measurements were obtained after normalization by the corresponding lung section area at each CT slice: the cross sectional area of small pulmonary vessel between 5 to 10 mm<sup>2</sup> (%CSA<sub>5-10</sub>), and less than 5 mm<sup>2</sup> (%CSA<sub><5</sub>), the mean number of cross-sectioned vessels CSN<sub>5-10</sub> and CSN<sub><5</sub>.

### **Circulating fibrocytes identification**

Non-adherent non-T (NANT) cells were purified from Peripheral Blood Mononuclear Cells (PBMC) separated from the whole blood, and circulating fibrocytes were identified as double positive cells for the surface marker CD45 and the intracellular marker collagen I by flow cytometry, as described previously (13). Briefly, PBMC were first separated from the whole blood by Ficoll-Hypaque (Dutscher, Brumath, France) density gradient centrifugation. The non-adherent mononuclear cell fraction was taken and washed in cold PBS containing 0.5%

bovine serum albumin (BSA, Sigma-Aldrich) and 2 mM Ethylene Diamine Tetra-acetic Acid (EDTA, Invitrogen). T-cells were further depleted with anti-CD3 monoclonal antibody (Miltenyi Biotech, Paris, France). Cells were fixed overnight with Cytofix/Cytoperm (eBioscience, Paris, France), washed in permeabilization buffer (eBioscience) and incubated either with mouse anti-human collagen I antibody (Millipore, St-Quentin-en-Yvelines, France) or with matched IgG1 isotype control (Santa Cruz Biotechnology, Heidelberg, Germany), followed by fluorescein isothiocyanate (FITC)-conjugated anti-mouse antibodies (Beckman Coulter, Villepinte, France). Next, the cell pellet was incubated either with allophycocyanin (APC)-conjugated anti-CD45 antibodies (BD Biosciences, San Jose, CA) or with matched APC-conjugated IgG1 isotype control (BD Biosciences). The cell suspension was analyzed with a BD FACSCanto II flow cytometer (BD Biosciences). Offline analysis was performed with FACSDiva (BD Biosciences) and FlowJo (Tree Star, Ashland, OR) software. The negative threshold for CD45 was set using a matched APC-conjugated IgG1 isotype control, and all subsequent samples were gated for the CD45 positive region. Cells gated for CD45 were analyzed for collagen I expression, with negative control thresholds set using FITC-stained cells. Specific staining for collagen I was determined as an increase in positive events over this threshold. Fibrocytes numbers were expressed as both a percentage of total PBMC counts and as absolute number of cells.

### **Bronchial epithelial supernatants**

Human bronchial epithelial cells (BEC) were derived from bronchial specimens as described previously (14). Bronchial epithelial tissue was cultured in bronchial epithelial growth medium (Stemcell, Grenoble, France) in a flask (0.75 cm<sup>2</sup>). After confluence, basal BEC were plated (2.10<sup>5</sup> cells per well) on uncoated nucleopore membranes (24-mm diameter, 0.4- $\mu$ m pore size, Transwell Clear; Costar, Cambridge, Mass) in ALI medium (Stemcell) applied at the basal side only to establish the air-liquid interface. Cells were maintained in culture for 21 days to obtain

a differentiated cell population with a mucociliary phenotype. Basal epithelial supernatant was collected every 2-3 days and used for further experiments.

### **Fibrocyte differentiation and survival**

A total of  $2 \cdot 10^6$  NANT cells resuspended in 0.2 ml DMEM (Fisher Scientific), containing 4.5 g/l glucose and glutamax, supplemented with 20% fetal calf serum (Biowest, Riverside, USA), penicillin/streptomycin and MEM non-essential amino acid solution (Sigma-Aldrich), was added to each well of a 6 well plate. After one week in culture, fibrocyte differentiation was induced by changing the medium for a serum-free medium (Fig E2), or for a serum-free medium containing 50% of basal epithelium supernatant (Fig E10). Mediums were changed every 2-3 days. After 2 weeks in culture, the cells were detached by accutase treatment (Fisher Scientific), fixed overnight with Cytotfix/Cytoperm and washed in permeabilization buffer. Cells were incubated either with rabbit anti-FSP1 polyclonal antibody (Agilent) or with matched IgG isotype control (Fisher Scientific), followed by Phycoerythrin (PE)-conjugated anti-rabbit antibody (Santa Cruz Biotechnology, Heidelberg, Germany). Next, the cell pellet was incubated either with FITC-conjugated mouse anti-human collagen I antibody (Millipore) or with matched FITC-conjugated IgG1 isotype control (Millipore) and with APC-conjugated anti-CD45 antibodies or with matched APC-conjugated IgG1 isotype control. The cell suspension was analyzed with a BD FACSCanto II flow cytometer. Cells gated for CD45 and FSP1 were analyzed for collagen-1 expression, with negative control thresholds set using isotype-stained cells. Specific staining for collagen-1 was determined as an increase in positive events over this threshold.

Propidium iodide (Fisher Scientific) was used for the detection of dying cells. After 2 weeks in culture, cells detached by accutase treatment were used to prepare single cell suspension at



$1.10^6$  cells/ml. After addition of propidium iodide, the dying cells (PI<sup>+</sup> cells) were detected by flow cytometry (BD Biosciences).

### **Statistical analysis**

Primary outcome was the density of bronchial fibrocytes in both distal and proximal airways. Secondary outcomes were lung function parameters, CT parameters and the percentage of blood fibrocytes in PBMC. The statistical analysis was performed with Prism 6 software (GraphPad, La Jolla, CA) and NCSS software (NCSS 2001, Kaysville, UT, USA). Values are presented as medians with individual plots or means  $\pm$  SD. Statistical significance, defined as  $P < 0.05$ , was analyzed by Fisher's exact tests for comparison of proportions, by two-sided independent t-tests for variables with a parametric distribution, and, by Mann–Whitney U tests, Wilcoxon tests and Spearman correlation coefficients for variables with a non-parametric distribution. Receiver operating characteristic (ROC) curves were built with NCSS software (NCSS 2001, Kaysville, UT, USA) and ROC analysis was performed to determine areas under the curve (AUC) and cut-off values for the best fibrocytes density in distal and proximal tissue specimens to predict COPD. Those 2 cut-off values were then used to evaluate the association between COPD and a high density of tissue fibrocytes using a univariate logistic regression analysis.

## References

1. GOLD 1998. Global Initiative for Chronic Obstructive Lung Disease. Global Strategy for the Diagnosis, Management and Prevention of Chronic Obstructive Pulmonary Disease. NIH Publication (updated 2011). Accessed May 1, 2012, at <http://www.goldcopd.org>.
2. Begueret H, Berger P, Vernejoux JM, Dubuisson L, Marthan R, Tunon-de-Lara JM. Inflammation of bronchial smooth muscle in allergic asthma. *Thorax* 2007; 62: 8-15.
3. Hogg JC, Chu F, Utokaparch S, Woods R, Elliott WM, Buzatu L, Cherniack RM, Rogers RM, Sciurba FC, Coxson HO, Pare PD. The nature of small-airway obstruction in chronic obstructive pulmonary disease. *N Engl J Med* 2004; 350: 2645-2653.
4. Coste F, Dournes G, Dromer C, Blanchard E, Freund-Michel V, Girodet PO, Montaudon M, Baldacci F, Picard F, Marthan R, Berger P, Laurent F. CT evaluation of small pulmonary vessels area in patients with COPD with severe pulmonary hypertension. *Thorax* 2016; 71: 830-837.
5. Dournes G, Laurent F, Coste F, Dromer C, Blanchard E, Picard F, Baldacci F, Montaudon M, Girodet PO, Marthan R, Berger P. Computed tomographic measurement of airway remodeling and emphysema in advanced chronic obstructive pulmonary disease. Correlation with pulmonary hypertension. *Am J Respir Crit Care Med* 2015; 191: 63-70.
6. Girodet PO, Dournes G, Thumerel M, Begueret H, Dos Santos P, Ozier A, Dupin I, Trian T, Montaudon M, Laurent F, Marthan R, Berger P. Calcium Channel Blocker Reduces Airway Remodeling in Severe Asthma. A Proof-of-Concept Study. *Am J Respir Crit Care Med* 2015; 191: 876-883.
7. Berger P, Laurent F, Begueret H, Perot V, Rouiller R, Raherison C, Molimard M, Marthan R, Tunon-de-Lara JM. Structure and function of small airways in smokers: relationship between air trapping at CT and airway inflammation. *Radiology* 2003; 228: 85-94.
8. Berger P, Perot V, Desbarats P, Tunon-de-Lara JM, Marthan R, Laurent F. Airway wall thickness in cigarette smokers: quantitative thin-section CT assessment. *Radiology* 2005; 235: 1055-1064.
9. Montaudon M, Berger P, de Dietrich G, Braquelaire A, Marthan R, Tunon-de-Lara JM, Laurent F. Assessment of airways with three-dimensional quantitative thin-section CT: in vitro and in vivo validation. *Radiology* 2007; 242: 563-572.
10. Uejima I, Matsuoka S, Yamashiro T, Yagihashi K, Kurihara Y, Nakajima Y. Quantitative computed tomographic measurement of a cross-sectional area of a small pulmonary vessel in nonsmokers without airflow limitation. *Jpn J Radiol* 2011; 29: 251-255.
11. Matsuoka S, Washko GR, Dransfield MT, Yamashiro T, San Jose Estepar R, Diaz A, Silverman EK, Patz S, Hatabu H. Quantitative CT measurement of cross-sectional area of small pulmonary vessel in COPD: correlations with emphysema and airflow limitation. *Acad Radiol* 2010; 17: 93-99.
12. Matsuoka S, Washko GR, Yamashiro T, Estepar RS, Diaz A, Silverman EK, Hoffman E, Fessler HE, Criner GJ, Marchetti N, Scharf SM, Martinez FJ, Reilly JJ, Hatabu H, National Emphysema Treatment Trial Research G. Pulmonary hypertension and computed tomography measurement of small pulmonary vessels in severe emphysema. *Am J Respir Crit Care Med* 2010; 181: 218-225.
13. Dupin I, Allard B, Ozier A, Maurat E, Ousova O, Delbrel E, Trian T, Bui HN, Dromer C, Guisset O, Blanchard E, Hilbert G, Vargas F, Thumerel M, Marthan R, Girodet PO, Berger P. Blood fibrocytes are recruited during acute exacerbations of chronic obstructive pulmonary disease through a CXCR4-dependent pathway. *J Allergy Clin Immunol* 2016; 137: 1036-1042 e1037.
14. Trian T, Allard B, Dupin I, Carvalho G, Ousova O, Maurat E, Bataille J, Thumerel M, Begueret H, Girodet PO, Marthan R, Berger P. House dust mites induce proliferation of severe asthmatic smooth muscle cells via an epithelium-dependent pathway. *Am J Respir Crit Care Med* 2015; 191: 538-546.



## Supplemental tables

**Table E1. Association between distributions of distal tissue fibrocytes and COPD clinical characteristics**

|                                          | Distal CD45 <sup>+</sup> FSP1 <sup>+</sup> cells density |             |
|------------------------------------------|----------------------------------------------------------|-------------|
|                                          | Spearman r                                               | P value     |
| Age (yrs.)                               | 0.06                                                     | 0.76        |
| Body-mass index (kg/m <sup>2</sup> )     | 0.09                                                     | 0.63        |
| Pack years (no.)                         | 0.21                                                     | 0.26        |
| <b>LFT</b>                               |                                                          |             |
| FEV <sub>1</sub> (% pred.)               | -0.28                                                    | 0.12        |
| FEV <sub>1</sub> /FVC ratio (%)          | -0.42                                                    | <b>0.02</b> |
| FVC (% pred.)                            | -0.31                                                    | 0.09        |
| RV (% pred)                              | 0.30                                                     | 0.10        |
| TLCO (% pred.)                           | -0.20                                                    | 0.31        |
| <b>Six-minute walk test distance (m)</b> | 0.14                                                     | 0.49        |
| <b>Arterial blood gases</b>              |                                                          |             |
| PaO <sub>2</sub> (mm Hg)                 | -0.27                                                    | 0.15        |
| PaCO <sub>2</sub> (mm Hg)                | 0.37                                                     | <b>0.04</b> |
| <b>CT parameters</b>                     |                                                          |             |
| Bronchi:                                 |                                                          |             |
| WA4 %                                    | 0.12                                                     | 0.56        |
| WT4 (mm)                                 | 0.08                                                     | 0.68        |
| WA5 %                                    | 0.29                                                     | 0.16        |
| WT5 (mm)                                 | 0.17                                                     | 0.41        |
| Emphysema:                               |                                                          |             |
| LAA (%)                                  | 0.36                                                     | 0.056       |
| Air trapping:                            |                                                          |             |
| MLA E (HU)                               | -0.44                                                    | <b>0.03</b> |
| MLA I (HU)                               | -0.20                                                    | 0.31        |
| MLA I-E (HU)                             | 0.08                                                     | 0.72        |
| Pulmonary Vessels                        |                                                          |             |
| %CSA <sub>&lt;5</sub>                    | -0.21                                                    | 0.26        |
| %CSA <sub>5-10</sub>                     | -0.15                                                    | 0.44        |
| CSN <sub>&lt;5</sub>                     | -0.18                                                    | 0.33        |
| CSN <sub>5-10</sub>                      | -0.16                                                    | 0.41        |

LFT, lung function test; FEV<sub>1</sub>, forced expiratory volume in 1 second; FVC, forced vital capacity; RV, residual volume; TLCO, Transfer Lung capacity of Carbon monoxide, PaO<sub>2</sub>, partial arterial oxygen pressure, PaCO<sub>2</sub>, partial arterial carbon dioxide pressure; WA, mean wall area; LA, mean lumen area, WA%, mean wall area percentage; WT, wall thickness; LAA, low-attenuation area; MLA E or I, mean lung attenuation value during expiration or inspiration. MLA I-E, difference between inspiratory and expiratory mean lung attenuation value. %CSA<sub><5</sub>, percentage of total lung area taken up by the cross-sectional area of pulmonary vessels less than 5 mm<sup>2</sup>; %CSA<sub>5-10</sub>, percentage of total lung area taken up by the cross-sectional area of pulmonary vessels between 5 and 10 mm<sup>2</sup>; CSN<sub><5</sub>, number of vessels less than 5 mm<sup>2</sup> normalized by total lung area; CSN<sub>5-10</sub>, number of vessels between 5 and 10 mm<sup>2</sup> normalized by total lung area; NR: not relevant. Correlation coefficient (r) and significance level (P value) were obtained by using nonparametric Spearman analysis.

**Table E2. Association between distributions of proximal tissue fibrocytes and COPD**

**clinical characteristics**

|                                          | <b>Proximal CD45<sup>+</sup> FSP1<sup>+</sup> cells density</b> |                |
|------------------------------------------|-----------------------------------------------------------------|----------------|
|                                          | <b>Spearman r</b>                                               | <b>P value</b> |
| Age (yrs.)                               | -0.09                                                           | 0.60           |
| Body-mass index (kg/m <sup>2</sup> )     | 0.32                                                            | 0.06           |
| Pack years (no.)                         | 0.02                                                            | 0.91           |
| <b>LFT</b>                               |                                                                 |                |
| FEV <sub>1</sub> (% pred.)               | -0.33                                                           | <b>0.049</b>   |
| FEV <sub>1</sub> /FVC ratio (%)          | -0.28                                                           | 0.10           |
| FVC (% pred.)                            | -0.34                                                           | <b>0.04</b>    |
| RV (% pred)                              | 0.43                                                            | <b>0.01</b>    |
| TLCO (% pred.)                           | -0.04                                                           | 0.80           |
| <b>Six-minute walk test distance (m)</b> | -0.14                                                           | 0.46           |
| <b>Arterial blood gases</b>              |                                                                 |                |
| PaO <sub>2</sub> (mm Hg)                 | -0.26                                                           | 0.14           |
| PaCO <sub>2</sub> (mm Hg)                | 0.20                                                            | 0.26           |
| <b>CT parameters</b>                     |                                                                 |                |
| Bronchi:                                 |                                                                 |                |
| WA4 %                                    | 0.50                                                            | <b>0.02</b>    |
| WT4 (mm)                                 | 0.54                                                            | <b>0.005</b>   |
| WA5 %                                    | 0.34                                                            | 0.10           |
| WT5 (mm)                                 | 0.42                                                            | <b>0.04</b>    |
| Emphysema:                               |                                                                 |                |
| LAA (%)                                  | 0.18                                                            | 0.34           |
| Air trapping:                            |                                                                 |                |
| MLA E (HU)                               | 0.07                                                            | 0.76           |
| MLA I (HU)                               | 0.08                                                            | 0.68           |
| MLA I-E (HU)                             | 0.28                                                            | 0.17           |
| Pulmonary Vessels                        |                                                                 |                |
| %CSA <sub>&lt;5</sub>                    | -0.07                                                           | 0.73           |
| %CSA <sub>5-10</sub>                     | -0.06                                                           | 0.77           |
| CSN <sub>&lt;5</sub>                     | -0.03                                                           | 0.88           |
| CSN <sub>5-10</sub>                      | -0.07                                                           | 0.70           |

LFT, lung function test; FEV<sub>1</sub>, forced expiratory volume in 1 second; FVC, forced vital capacity; RV, residual volume; TLCO, Transfer Lung capacity of Carbon monoxide, PaO<sub>2</sub>, partial arterial oxygen pressure, PaCO<sub>2</sub>, partial arterial carbon dioxide pressure; WA, mean wall area; LA, mean lumen area, WA%, mean wall area percentage; WT, wall thickness; LAA, low-attenuation area; MLA E or I, mean lung attenuation value during expiration or inspiration. MLA I-E, difference between inspiratory and expiratory mean lung attenuation value. %CSA<sub><5</sub>, percentage of total lung area taken up by the cross-sectional area of pulmonary vessels less than 5 mm<sup>2</sup>; %CSA<sub>5-10</sub>, percentage of total lung area taken up by the cross-sectional area of pulmonary vessels between 5 and 10 mm<sup>2</sup>; CSN<sub><5</sub>, number of vessels less than 5 mm<sup>2</sup> normalized by total lung area; CSN<sub>5-10</sub>, number of vessels between 5 and 10 mm<sup>2</sup> normalized by total lung area; NR: not relevant. Correlation coefficient (r) and significance level (P value) were obtained by using nonparametric Spearman analysis.

**Table E3. Patient characteristics**

|                                          | <b>COPD</b> |
|------------------------------------------|-------------|
| <b>n</b>                                 | 3           |
| Age (yr)                                 | 68.7 ± 15.0 |
| Sex (Men/Woman)                          | 2/1         |
| Body-mass index (kg/m <sup>2</sup> )     | 21.0 ± 3.5  |
| Current smoker (Y/N)                     | 2/1         |
| Former smoker (Y/N)                      | 1/2         |
| Pack years (no.)                         | 42.3 ± 24.2 |
| <b>PFT</b>                               |             |
| FEV <sub>1</sub> (% pred.)               | 58.3 ± 22.5 |
| FEV <sub>1</sub> /FVC ratio (%)          | 53.3 ± 11.5 |
| FVC (% pred.)                            | 84.0 ± 27.6 |
| <b>Six-minute walk test distance (m)</b> | 550 ± 42    |
| <b>Arterial blood gases</b>              |             |
| PaO <sub>2</sub> (mm Hg)                 | 77.0 ± 6.1  |
| PaCO <sub>2</sub> (mm Hg)                | 37.0 ± 4.2  |

Plus–minus values are means ± SD. PFT, pulmonary function test; FEV<sub>1</sub>, forced expiratory volume in 1 second; FVC, forced vital capacity; PaO<sub>2</sub>, partial arterial oxygen pressure, PaCO<sub>2</sub>, partial arterial carbon dioxide pressure.



**Table E4. Patient characteristics (for bronchial epithelial supernatants production)**

|                                      | <b>COPD</b> | <b>Control</b> |
|--------------------------------------|-------------|----------------|
| n                                    | 2           | 2              |
| Age (yr)                             | 62.5 ± 12.0 | 70.5 ± 13.4    |
| Sex (Men/Woman)                      | 0/2         | 2/0            |
| Body-mass index (kg/m <sup>2</sup> ) | 31.5 ± 7.8  | 24.5 ± 0.7     |
| Current smoker (Y/N)                 | 0/1*        | 0/2            |
| Former smoker (Y/N)                  | 1/0*        | 0/2            |
| Pack years (no.)                     | 50.0 ± 70.7 | 0              |
| <b>PFT</b>                           |             |                |
| FEV <sub>1</sub> (% pred.)           | 62.5 ± 3.5  | 113.5 ± 62.9   |
| FEV <sub>1</sub> /FVC ratio (%)      | 61.0 ± 0    | 81.5 ± 0.1     |

Plus-minus values are means ± SD. PFT, pulmonary function test; FEV<sub>1</sub>, forced expiratory volume in 1 second; FVC, forced vital capacity. \* one of the two COPD patients has been professionally exposed to noxious particles.

**Table E5. Patient characteristics**

|                                          | <b>COPD</b>      |
|------------------------------------------|------------------|
| <b>n</b>                                 | <b>6</b>         |
| Age (yr)                                 | 69.2 ± 8.0       |
| Sex (Men/Woman)                          | 2/4              |
| Body-mass index (kg/m <sup>2</sup> )     | 27.7 ± 5.6       |
| Current smoker (Y/N)                     | 4/2              |
| Former smoker (Y/N)                      | 2/4              |
| Pack years (no.)                         | 66.3 ± 24.7      |
| <b>PFT</b>                               |                  |
| FEV <sub>1</sub> (% pred.)               | 67.1 ± 22.5      |
| FEV <sub>1</sub> /FVC ratio (%)          | 62.1 ± 6.4       |
| FVC (% pred.)                            | 86.2 ± 30.0      |
| <b>Six-minute walk test distance (m)</b> | <b>395 ± 187</b> |
| <b>Arterial blood gases</b>              |                  |
| PaO <sub>2</sub> (mm Hg)                 | 71.1 ± 6.6       |
| PaCO <sub>2</sub> (mm Hg)                | 37.1 ± 4.7       |

Plus-minus values are means ± SD. PFT, pulmonary function test; FEV<sub>1</sub>, forced expiratory volume in 1 second; FVC, forced vital capacity; PaO<sub>2</sub>, partial arterial oxygen pressure, PaCO<sub>2</sub>, partial arterial carbon dioxide pressure.

## **Supplemental figures legends**

### **Supplementary Fig E1. Study design.**

Numbers of patients who were included and had fibrocyte density quantification in proximal and distal airways.

### **Supplementary Fig E2. CD45<sup>+</sup> FSP1<sup>+</sup> cells purified from NANT cells express collagen I after 2 weeks of differentiation in culture.**

Representative dot plots of flow cytometry for CD45, FSP1 and collagen I expression. Left panels: total Non-Adherent Non T (NANT) cell population selected on the scatter plot of FSC-A vs SSC-A. Middle panels: a gate (CD45<sup>+</sup> and FSP1<sup>+</sup>) was drawn in FSP1-PE vs APC-CD45 dot plot to define the Q2 population (positive population for both CD45 and FSP1). Right panels: a gate (collagen I<sup>+</sup>) was drawn in FITC-collagen I (colI) histogram to define the P3 population (positive population for CD45, FSP1 and collagen I). A, isotype control for CD45, FSP1 and collagen I. B, CD45, FSP1 and collagen I stainings. APC: allophycocyanin; FITC: fluorescein isothiocyanate; PE: Phycoerythrin; FSC-A: forward scatter; SSC-A: side scatter.

### **Supplementary Fig E3. Presence of fibrocytes in peribronchial area outside the smooth muscle layer.**

Representative staining of CD45 (green) and FSP1 (red) in distal (left) and proximal (right) bronchial tissue specimens. The lower panels show higher magnification of the small area (black boxes) defined in the upper panels. The smooth muscle layer has been highlighted in orange. The yellow arrowheads indicate fibrocytes, defined as CD45<sup>+</sup> FSP1<sup>+</sup> cells.

**Supplementary Fig E4. Relationship between the density of CD45<sup>+</sup> FSP1<sup>+</sup> cells in proximal airways and that in distal airways.**

Densities measured in control subjects and COPD patients are represented respectively with black and open circles. Correlation coefficient ( $r$ ) and significance level ( $P$  value) were obtained by using nonparametric Spearman analysis.

**Supplementary Fig E5. CD3<sup>+</sup> FSP1<sup>+</sup> cells represent a minor fraction of CD45<sup>+</sup> FSP1<sup>+</sup> cells.**

A, Representative stainings of CD3 (brown, top panels) and FSP1 (green, middle panels) and merged segmented images (CD3, red and FSP1, green, bottom panels) in distal lung tissue from COPD patient. Middle and right columns represent higher magnification of images in the left column. The yellow arrowheads indicate CD3<sup>+</sup> FSP1<sup>+</sup> cells. B, D, Quantification of CD3<sup>+</sup> FSP1<sup>+</sup> cells density (normalized by the sub-epithelial area) in distal (B) and proximal (D) tissue specimens from control subjects and COPD patients. C, E, Comparison of sub-epithelial areas in distal (C) and proximal (E) tissue specimens from control subjects and COPD patients. B-D, medians are represented as horizontal lines.

**Supplementary Fig E6. CD19<sup>+</sup> FSP1<sup>+</sup> cells are detected neither in proximal and nor in distal airways.**

A-B, Representative stainings of CD19 (brown, top panels) and FSP1 (green, middle panels) and merged segmented images (CD19, red and FSP1, green, bottom panels) in distal (A) and proximal (B) bronchial tissue specimens from COPD patient. The right columns represent higher magnification of images in the left columns.

**Supplementary Fig E7. CD34<sup>+</sup> FSP1<sup>+</sup> cells are almost absent in distal airways.**

A, Representative stainings of CD34 (brown, top left panel) and FSP1 (green, bottom left panels) and merged segmented image (CD34, red and FSP1, green, right panel) in distal tissue specimen from COPD patient. The yellow arrowhead indicates CD34<sup>+</sup> FSP1<sup>+</sup> cells. B, Quantification of CD34<sup>+</sup> FSP1<sup>+</sup> cells density (normalized by the sub-epithelial area) in distal tissue specimens from control subjects and COPD patients. Median is represented as horizontal line. C, Percentage of tissue specimens in which CD34<sup>+</sup> FSP1<sup>+</sup> cells have been detected (density>0, black bars) or undetected (density=0, white bars) in distal tissue specimens from control subjects and COPD patients.

**Supplementary Fig E8. CD34<sup>+</sup> FSP1<sup>+</sup> cells are present at a very low level in proximal airways.**

A, Representative stainings of CD34 (brown, top left panel) and FSP1 (green, bottom left panels) and merged segmented image (CD34, red and FSP1, green, right panel) in proximal tissue specimen from COPD patient. The yellow arrowhead indicates CD34<sup>+</sup> FSP1<sup>+</sup> cells. B, Quantification of CD34<sup>+</sup> FSP1<sup>+</sup> cells density (normalized by the sub-epithelial area) in proximal tissue specimens from control subjects and COPD patients. Median is represented as horizontal line. C, Percentage of tissue specimens in which CD34<sup>+</sup> FSP1<sup>+</sup> cells have been detected (density>0, black bars) or undetected (density=0, white bars) in proximal tissue specimens from control subjects and COPD patients.

**Supplementary Fig E9. Level of circulating fibrocytes and relationship with tissue fibrocytes density.**

A, Level of circulating fibrocytes (CD45<sup>+</sup> Col1<sup>+</sup> cells), expressed as percentage of PBMC, measured in blood from control subjects ("Cont", n = 22), and COPD patients ("COPD", n=12). Medians are represented as horizontal lines. B, Relationships between the level of circulating fibrocytes and the density of CD45<sup>+</sup> FSP1<sup>+</sup> cells in distal airways measured in control subjects (black circles) and COPD patients (open circles). B, C, Correlation coefficient (r) and significance level (P value) were obtained by using nonparametric Spearman analysis.

**Supplementary Fig E10. Influence of epithelium on fibrocyte survival.**

A, Representative histograms of flow cytometry for Propidium Iodure (PI) fluorescence recorded on fibrocytes exposed to epithelium supernatants, either from control subjects (left panel), or COPD patient (right panel). A gate was drawn to define the population of dead cells (PI<sup>+</sup> cells). B, Quantification of PI<sup>+</sup> cells in fibrocytes from COPD patients (n=6) exposed to epithelium supernatants from control subjects (red circles) or COPD patients (blue circles). \*: P<0.05, Wilcoxon test.

**Figure E1**

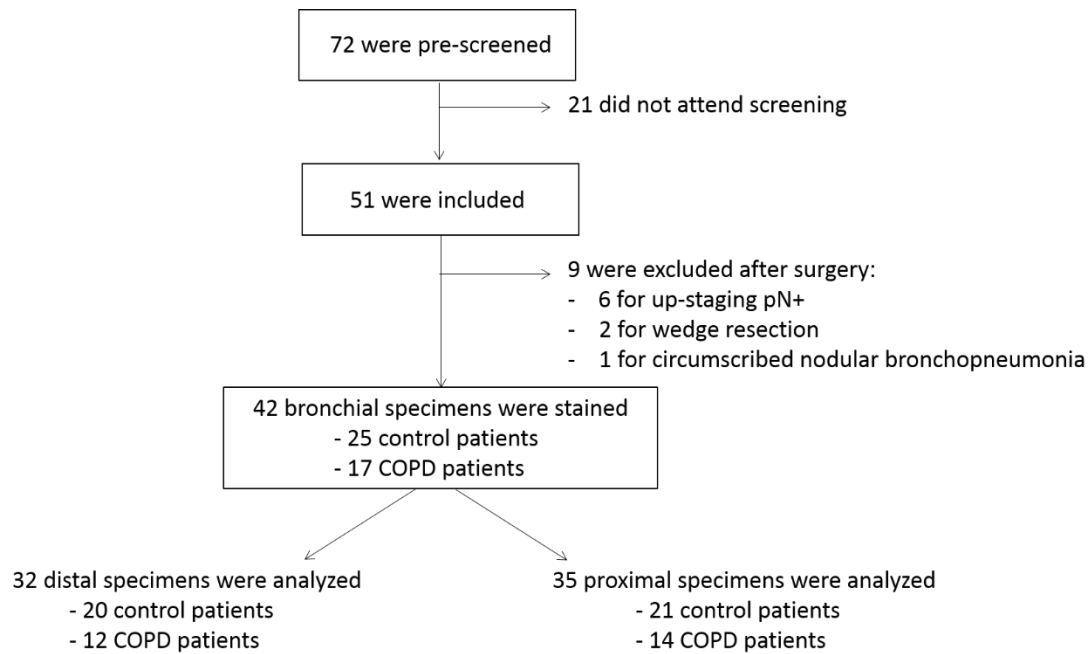

**Figure E2**

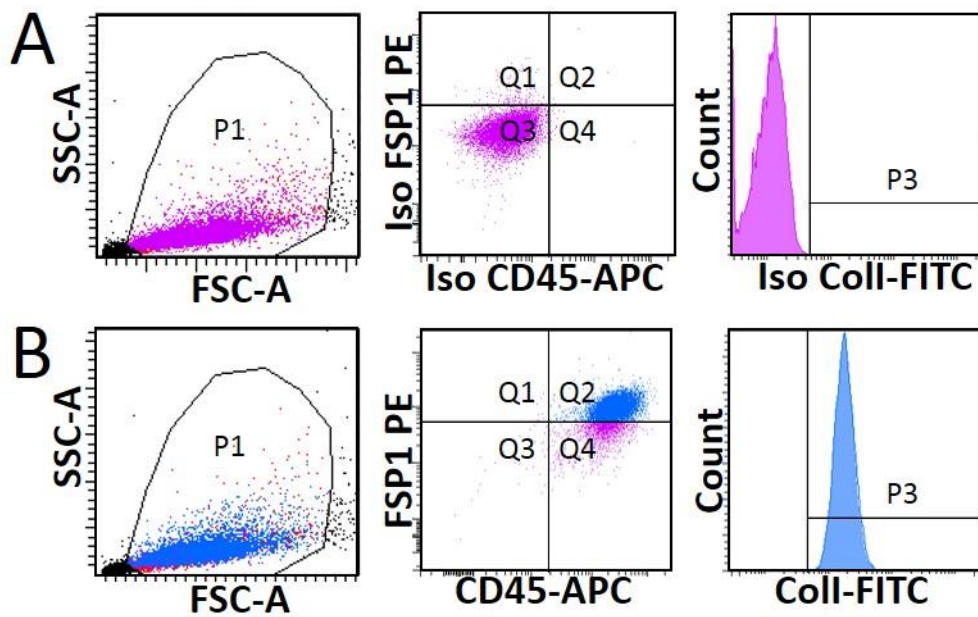

Q2 : CD45<sup>+</sup> FSP1<sup>+</sup> cells

P3 : CD45<sup>+</sup> FSP1<sup>+</sup> Coll<sup>+</sup> cells



**Figure E3**

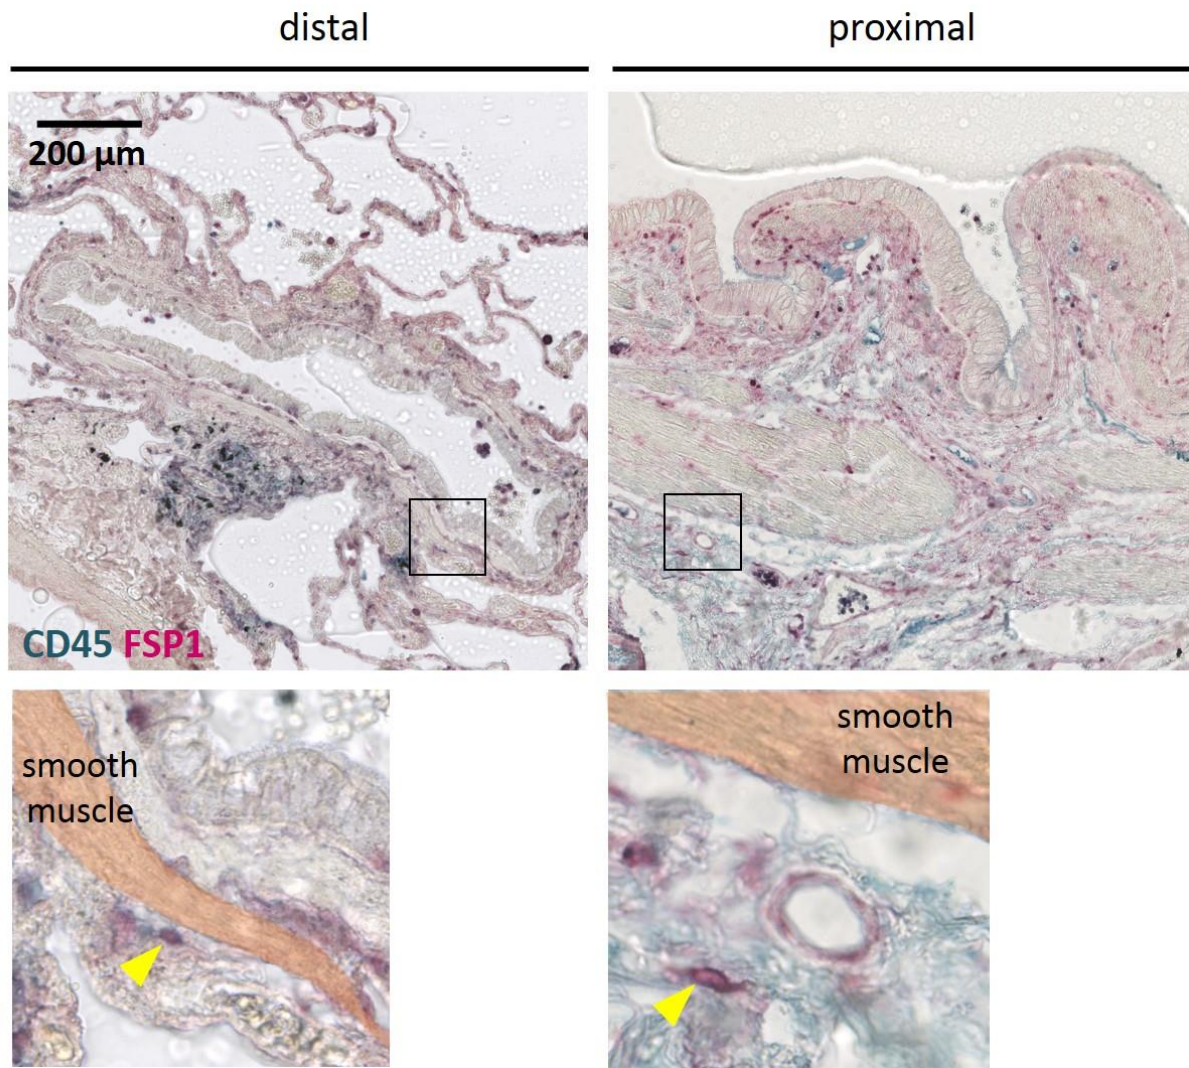

**Figure E4**

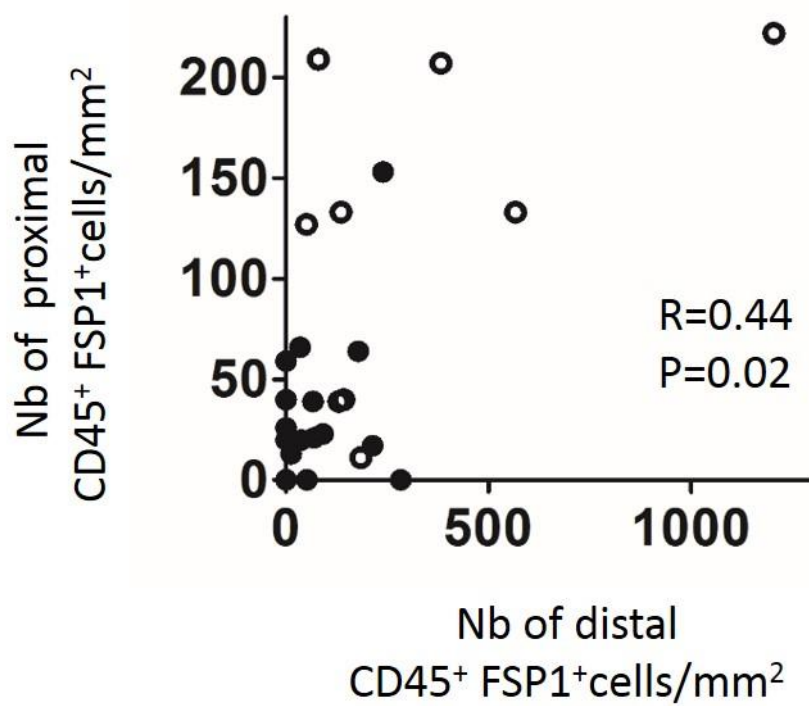

### Figure E5

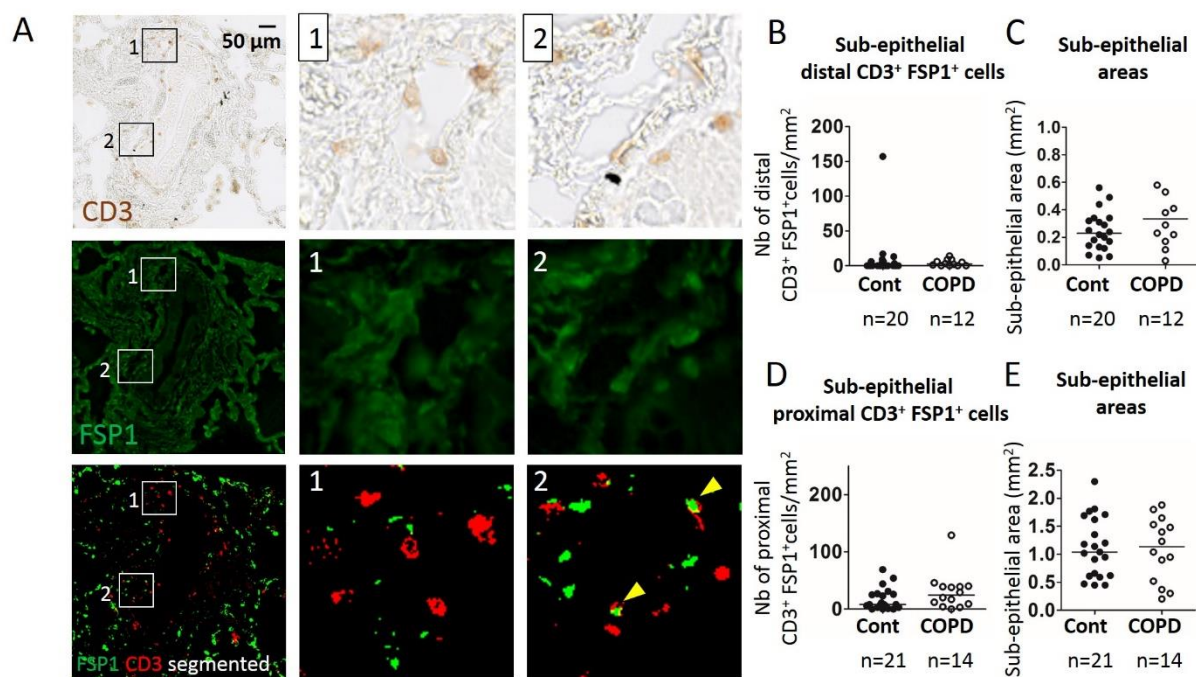

**Figure E6**

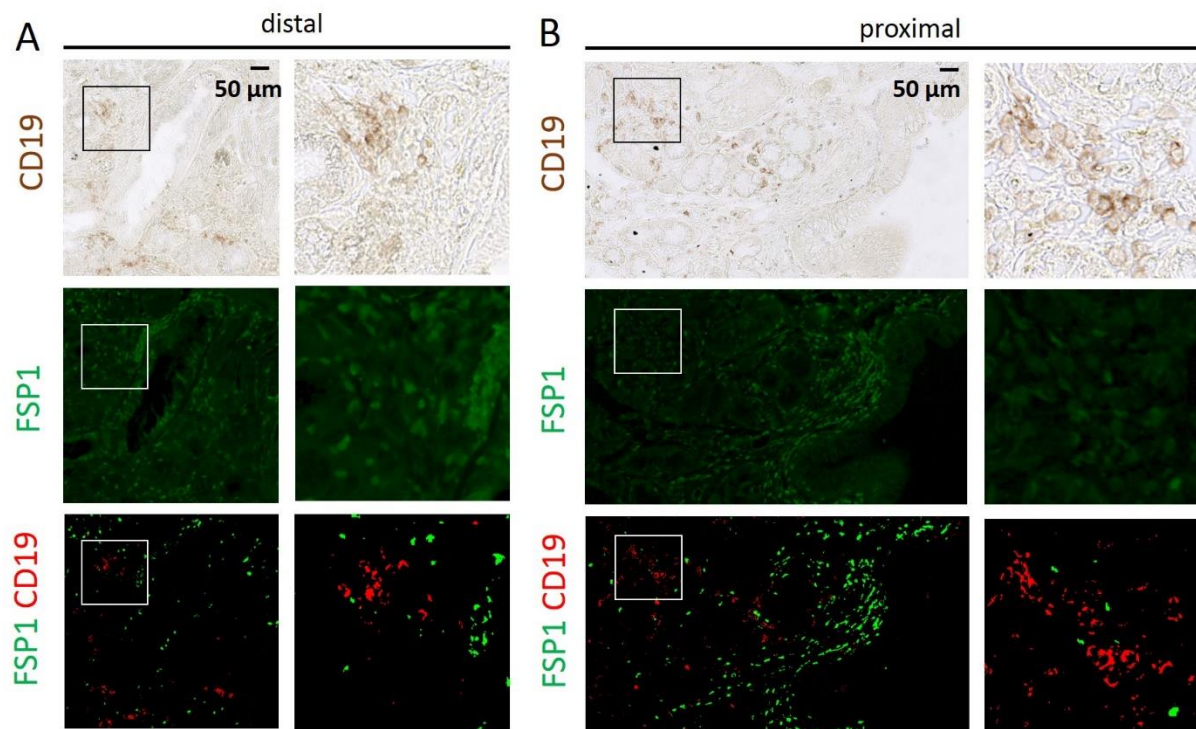

## Figure E7

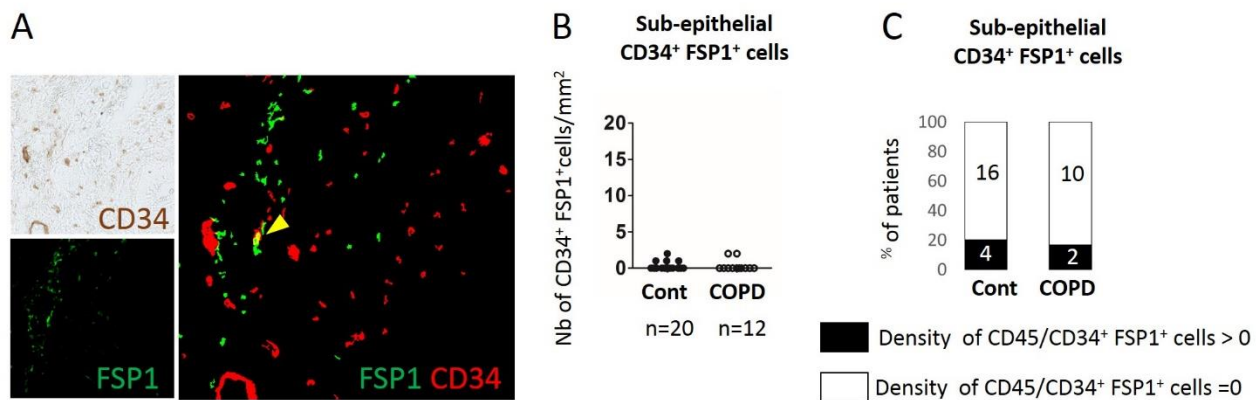



**Figure E9**

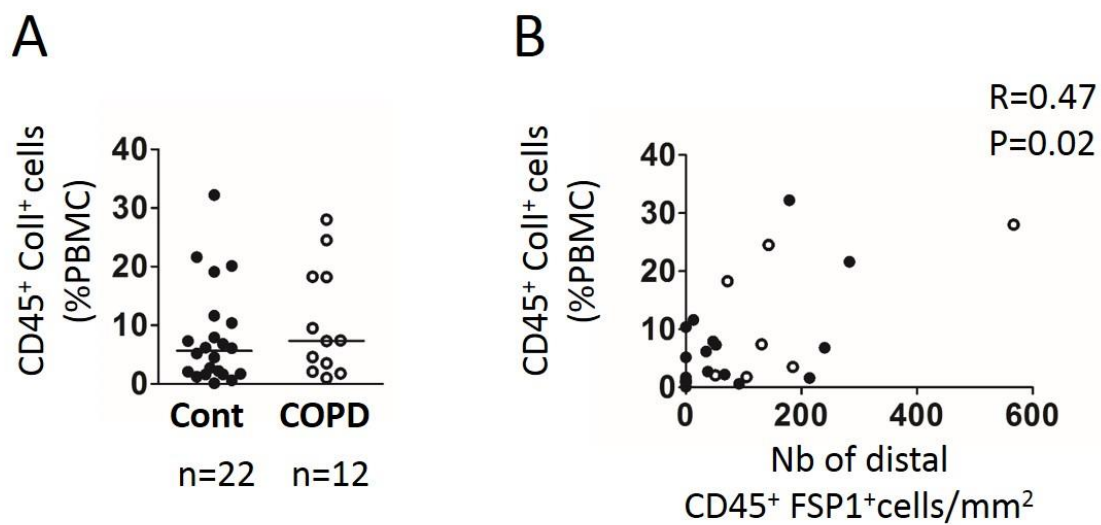

**Figure E10**

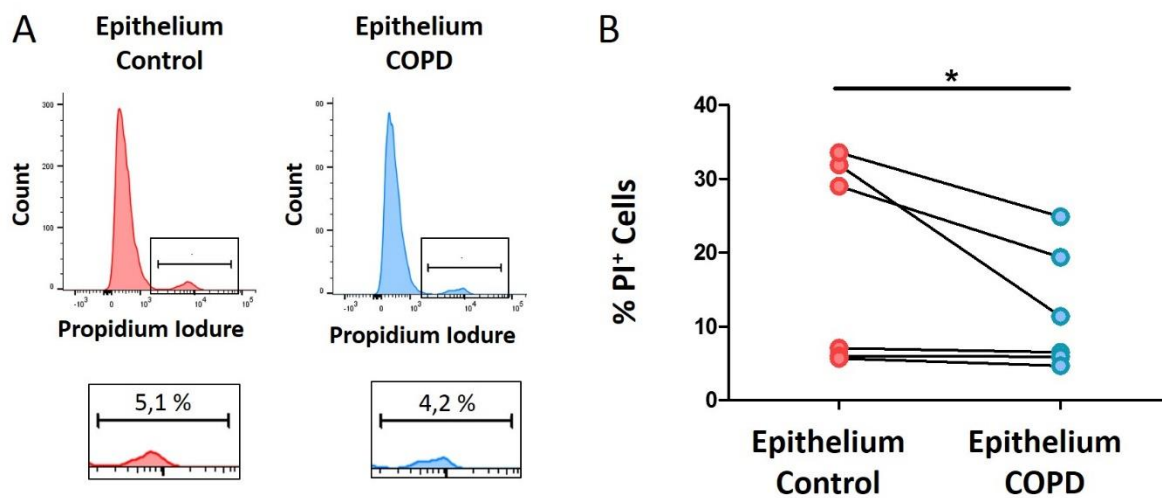

Source: https://www.biorxiv.org/content/10.1101/449843v1.full.pdf
